# Supplementary material for: Synthesis of annulated rosarins via iminium activation
Source: Royal Society of Chemistry journal article supplement (doi:10.1039/d4qo01559b), 2024-01-01
Supplement: d4qo01559b1.pdf [file d4qo01559b1.pdf]

## Supplementary Information

### Synthesis of Annulated Rosarins via Iminium Activation

Duong D. Nguyen,<sup>a</sup> Jorge Labella,<sup>\*b</sup> Marta Gómez-Gómez,<sup>b</sup> Tomás Torres,<sup>\*b,c,d</sup> and Jonathan L. Sessler.<sup>\*a</sup>

<sup>a</sup> Department of Chemistry, The University of Texas at Austin, 105 E 24th Street A5300, Austin, TX, 78712, United States. E-mail: sessler@cm.utexas.edu

<sup>b</sup> Departamento de Química Orgánica, Universidad Autónoma de Madrid, Campus de Cantoblanco, C/ Francisco Tomás y Valiente 7, 28049 Madrid (Spain) E-mail: jorge.labella; tomas.torres@uam.es

<sup>c</sup> Institute for Advanced Research in Chemical Sciences (IAdChem), Universidad Autónoma de Madrid, 28049 Madrid, Spain

<sup>d</sup> IMDEA-Nanociencia, Campus de Cantoblanco, 28049 Madrid, Spain

#### Table of Contents

|                                                                    |    |
|--------------------------------------------------------------------|----|
| 1. Instrumentation and Materials .....                             | 2  |
| 2. Synthetic Procedures and Characterization Data .....            | 3  |
| Synthesis and characterization of aldehyde precursors .....        | 3  |
| Synthesis and characterization of naphthorosarin macrocycles ..... | 4  |
| 3. NMR Spectra .....                                               | 10 |
| 4. Mass Spectra .....                                              | 24 |
| 5. UV-vis Spectra .....                                            | 28 |
| 6. Electrochemistry .....                                          | 32 |
| 7. Computational studies .....                                     | 33 |
| 8. Supporting References .....                                     | 35 |

## 1. Instrumentation and Materials

Reaction progress was monitored by thin layer chromatography (TLC), employing aluminum sheets coated with silica gel type 60 F254 (0.2 mm thick, Merck) and either a 254 or 365 nm UV lamp. Purification and separation of the synthesized products was performed by normal-phase column chromatography, using silica gel (230–400 mesh, 0.040–0.063 mm, Merck) and size exclusion chromatography, using Bio-Beads™ S-X1 (styrene divinylbenzene beads, 40–80  $\mu\text{m}$  bead size, Bio-Rad). Eluents, along with the relative ratios in the case of solvent mixtures, are indicated for each particular case. Nuclear magnetic resonance spectra ( $^1\text{H}$ ,  $^{13}\text{C}$ ,  $^{19}\text{F}$  NMR) were recorded on Agilent MR400, Bruker AV-400, Bruker DRX-500 or Varian MR600 spectrometers at the Department of Chemistry of The University of Texas at Austin (UT Austin). The deuterated solvent employed in each case is indicated in brackets, and its residual peak was used to calibrate the spectra using literature reference  $\delta$  ppm values.<sup>1</sup> The peaks marked with asterisks indicates residual solvent signals. The NMR spectroscopic solvents were purchased from Cambridge Isotope Laboratories or Fischer Scientific. All spectra were recorded at room temperature. High resolution ESI mass spectrometry was carried out using an Ion Spec Fourier Transform mass spectrometer (9.4 T). Electrospray ionization (ESI) mass spectra were recorded on an Agilent Technologies 6530 Accurate-Mass Q-TOF instrument housed in the Department of Chemistry, UT Austin. Ultraviolet-visible (UV-Vis) spectra were recorded using spectroscopic grade solvents using a Varian Cary 5000 spectrophotometer housed in the in the Department of Chemistry, UT Austin. The logarithm of the molar extinction coefficient ( $\epsilon$ ) is indicated in brackets for each maximum. Electrochemical characterizations were performed with a three-electrode setup on AutoLab PGStat 30 instrument from the Departamento de Química Orgánica of Universidad Autónoma de Madrid. The measurements were carried out in dichloromethane using 0.1 M tetrabutylammonium hexafluorophosphate (TBAPF<sub>6</sub>) as electrolyte and compound concentration of approx.  $10^{-4}$  M. A platinum rod was used as working electrode, platinum wire served as counter electrode and Ag/AgCl as reference electrode. Ferrocene (Fc) was used as the internal standard and all the potentials were noted relative to the Fc/Fc<sup>+</sup> couple. Scan rate was 100 mV s<sup>-1</sup>. The data were recorded with the NOVA 2.0 software. Chemicals were purchased from commercial suppliers and used without further purification. Dry solvents were purchased from commercial suppliers as anhydrous grade or thoroughly dried before use employing standard methods. Solid, hygroscopic reagents were dried in a vacuum oven before use. The synthesis and characterization of naphthobipyrrole and 4-azidotetrafluorobenzaldehyde has been previously reported.<sup>2,3</sup>

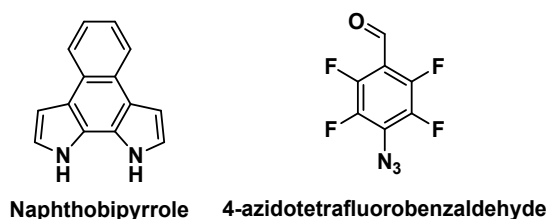

## 2. Synthetic Procedures and Characterization Data

### Synthesis and characterization of aldehyde precursors

#### 2,6-Difluoro-3,5-dimethoxybenzaldehyde

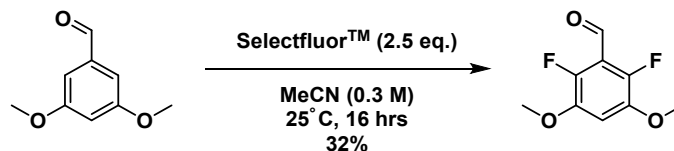

Using an ice bath, a solution of crude 3,5-dimethoxybenzaldehyde in acetonitrile (15 mL) was cooled to 0°C. To this solution, SelectFluor™ (5.2 g, 11 mmol, 2.5 equiv.) was added portion-wise while the temperature was kept below 0°C. The resulting mixture was stirred at 15°C for 16 hours. The reaction mixture was concentrated to remove solvent. The residue was diluted with water (10 mL) and neutralized with saturated aqueous NaHCO<sub>3</sub>. The product was extracted with ethyl acetate (10 mL x3). The collected organic fraction was then washed with brine (10 mL) and water (10 mL) before being dried over Na<sub>2</sub>SO<sub>4</sub> and concentrated *in vacuo*. The resulting crude product was purified via silica gel column chromatography using hexanes: ethyl acetate = 4:1 as the eluent. **Yield** 0.28 g, 32%, light yellow crystalline solid. **<sup>1</sup>H NMR** (400 MHz, CDCl<sub>3</sub>) δ 10.35 (s, 1H), 6.88 (t, *J* = 8.0 Hz, 1H), 3.91 (s, 6H). **<sup>13</sup>C NMR** (101 MHz, CDCl<sub>3</sub>) δ 184.72, 147.41, 144.81, 143.75, 106.87, 57.47. **<sup>19</sup>F NMR** (376 MHz, CDCl<sub>3</sub>) δ -147.76 (d, *J* = 7.9 Hz). **HRMS** (ESI positive): *m/z* [M+Na<sup>+</sup>] Calculated for C<sub>9</sub>H<sub>8</sub>F<sub>2</sub>O<sub>3</sub>: 225.0334, found: 225.0338.

#### 4-((4-Bromophenyl)thio)-2,3,5,6-tetrafluorobenzaldehyde

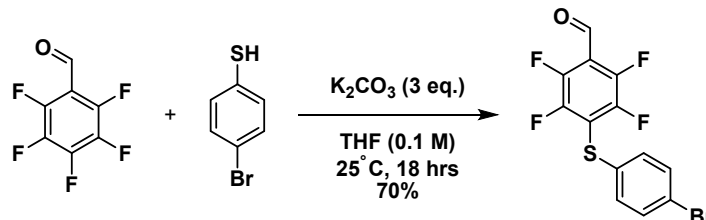

In a 250 mL round bottomed flask, a mixture of pentafluorobenzaldehyde (2.0 g, 10.2 mmol, 1 equiv.) and 4-bromobenzenethiol (1.93 g, 10.2 mmol, 1 equiv.) was dissolved in THF (100 mL). The solution was then deoxygenated for 10 minutes by bubbling with nitrogen gas. To the resulting solution, K<sub>2</sub>CO<sub>3</sub> (4.23 g, 30.6 mmol, 3 equiv.) was added in one portion. Then, the resulting mixture was stirred at 25°C for 18 hours. The reaction mixture was concentrated to remove solvent. The residue was diluted with water (30 mL) extracted with ethyl acetate (10 mL x3). The combined organic fractions were then washed with brine (10 mL) and water (10 mL) before being dried over Na<sub>2</sub>SO<sub>4</sub> and concentrated *in vacuo*. The resulting crude product was purified via silica gel column chromatography using hexanes: ethyl acetate = 4:1 as the eluent. **Yield** 2.6 g, 70%, yellow powder. **<sup>1</sup>H NMR** (400 MHz, CDCl<sub>3</sub>) δ 10.29 (s, 1H), 7.49 – 7.44 (m, 2H), 7.32 (d, *J* = 8.4 Hz, 2H). **<sup>13</sup>C NMR** (101 MHz, CDCl<sub>3</sub>) δ 182.52, 134.01, 133.23, 133.10, 133.07, 131.40, 130.51, 123.90, 115.32, 77.80, 77.48, 77.16, 0.46. **<sup>19</sup>F NMR** (376 MHz, CDCl<sub>3</sub>) δ -132.18 – -132.34 (m), -144.34 – -144.51 (m). **HRMS** (ESI positive): *m/z* [M+Na<sup>+</sup>] Calculated for C<sub>13</sub>H<sub>5</sub>BrF<sub>4</sub>OS: 364.9253, found: 364.9253.

## Synthesis and characterization of naphthorosarin macrocycles

### General procedures for the synthesis of naphthorosarin macrocycles

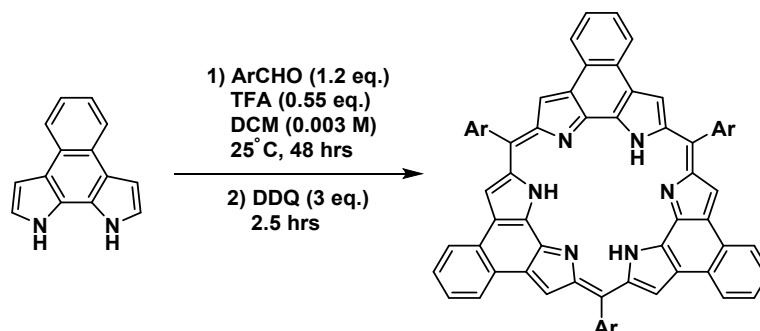

**General procedure A (without iminium catalyst):**<sup>4</sup> A 1 L round-bottomed flask was charged with naphthobipyrrole (100 mg, 0.484 mmol, 1 equiv.) and aldehyde (1.2 equiv.). Dry dichloromethane (300 mL, 0.0015 M) was then added to dissolve the solids. The reaction mixture was bubbled with nitrogen for 15 minutes and the flask fully covered with aluminum foil. Trifluoroacetic acid (20  $\mu$ L, 0.26 mmol, 0.55 equiv.) was then slowly added via syringe. The reaction mixture was kept stirring at room temperature for 72 hours under a nitrogen atmosphere. After this time, DDQ (352 mg, 1.55 mmol, 3.2 equiv.) was added, and the reaction mixture was stirred for a further 2.5 hours open to air and light. Once the reaction was deemed complete based on a TLC analysis, excess triethylamine (0.5 mL) was added to the reaction flask and the whole solution was passed through a plug of neutral alumina. Excess dichloromethane (about 200 mL) was used to elute fully the dark purple fraction. The resulting solution was then evaporated to dryness. The crude product obtained in this way was purified via silica gel column chromatography (doped with 1% triethylamine) to obtain the desired solid. Detailed column conditions are given below for each particular rosarin compound. Finally, recrystallization of the solid obtained after removing the volatiles following chromatography from dichloromethane/methanol yielded naphthorosarin as a dark brown solid.

**General procedure B (with iminium catalyst):** A 1 L round-bottomed flask was charged with naphthobipyrrole (100 mg, 0.484 mmol, 1 equiv.) and aldehyde (1.2 equiv.). Then dry dichloromethane (300 mL, 0.0015 M) and pyrrolidine (20  $\mu$ L, 0.242 mmol, 0.5 equiv.) was subsequently added. The reaction mixture was bubbled with nitrogen for 15 minutes and the flask fully covered with aluminum foil. Trifluoroacetic acid (0.22 mL, 2.91 mmol, 6 equiv.) was then slowly added via syringe. The reaction mixture was kept stirring at room temperature for 72 hours under a nitrogen atmosphere. After this time, DDQ (352 mg, 1.55 mmol, 3.2 equiv.) was added, and the reaction mixture was stirred for a further 2.5 hours open to air and light. Once the reaction was deemed complete as judged by TLC analysis, excess triethylamine (0.5 mL) was added to the reaction flask and the whole solution was passed through a plug of neutral alumina. Excess dichloromethane (about 200 mL) was used to elute fully the dark purple fraction. The resulting solution was then evaporated to dryness. The crude product was purified via silica gel column chromatography (doped with 1% triethylamine) to give the desired solid. Detailed column conditions are given below for each particular rosarin compound. Finally, recrystallization of the solid from dichloromethane/methanol as per Procedure A yielded naphthorosarin as a dark brown solid.

## NRos-1

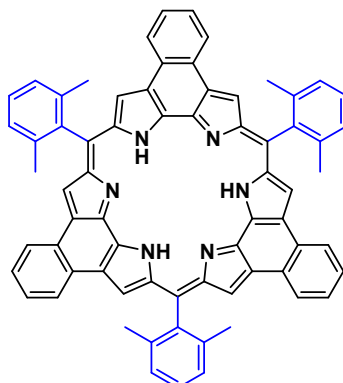

A 1 L round bottomed flask charged with naphthobipyrrole (100 mg, 0.484 mmol, 1 equiv.) and 2,6-dimethylbenzaldehyde (78.1 mg, 0.58 mmol, 1.2 equiv.). The general procedures were then followed to obtain a crude product. This crude product was purified via silica gel column chromatography (doped with 1% triethylamine) using hexanes: dichloromethane, gradient of 1:1 to 1:2. Finally, recrystallization of the solid from dichloromethane/methanol yielded **NRos-1** as a dark brown solid. **Yield** 12.5 mg, 8% (procedure B) **<sup>1</sup>H NMR** (600 MHz, THF-*d*<sub>8</sub>) δ 7.13 – 7.11 (m, 6H), 7.08 (d, *J* = 6.9 Hz, 3H), 7.00 (d, *J* = 7.5 Hz, 6H), 6.95 (dq, *J* = 6.0, 2.7 Hz, 6H), 5.20 (s, 6H), 2.42 (s, 18H). **<sup>13</sup>C NMR** (151 MHz, THF-*d*<sub>8</sub>) δ 148.78, 144.21, 135.81, 134.77, 130.72, 127.83, 127.32, 125.57, 124.24, 123.48, 123.34, 119.05, 29.63. **HRMS** (ESI positive): *m/z* [M+H<sup>+</sup>] Calculated for C<sub>69</sub>H<sub>48</sub>N<sub>6</sub>: 961.4013, found: 961.4011. **UV-Vis** (CH<sub>2</sub>Cl<sub>2</sub>): λ<sub>max</sub> (nm) (log ε(dm<sup>3</sup> cm<sup>-1</sup> mol<sup>-1</sup>)): 485 (4.6), 571 (4.3).

## NRos-2

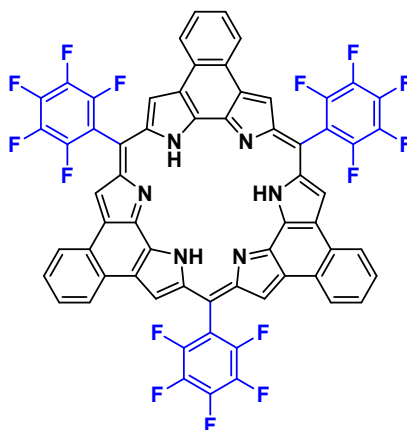

A 1 L round bottomed flask charged with naphthobipyrrole (100 mg, 0.484 mmol, 1 equiv.) and 2,6-dimethylbenzaldehyde (114 mg, 0.58 mmol, 1.2 equiv.). The general procedures were then followed to obtain a crude product. This crude product was purified via silica gel column chromatography (doped with 1% triethylamine) using hexanes: dichloromethane, gradient of 1:1 to 1:2. Finally, recrystallization of the solid from dichloromethane/methanol yielded **NRos-2** as a dark brown solid. **Yield** 28 mg, 15% (procedure A); 37 mg, 20% (procedure B). **<sup>1</sup>H NMR** (400 MHz, THF-*d*<sub>8</sub>) δ 7.00 (d, *J* = 19.1 Hz, 12H), 5.13 (s, 6H). **<sup>19</sup>F NMR** (376 MHz, THF-*d*<sub>8</sub>) δ -140.02, -154.77, -160.95. The yield (procedure A), **<sup>1</sup>H NMR** and **<sup>19</sup>F NMR**

spectra roved concordant with previously published data.<sup>4</sup> **UV-Vis** (CH<sub>2</sub>Cl<sub>2</sub>) :  $\lambda_{\max}$  (nm) (log  $\epsilon$ (dm<sup>3</sup> cm<sup>-1</sup> mol<sup>-1</sup>)): 463 (5.1), 588 (4.7).

### NRos-3

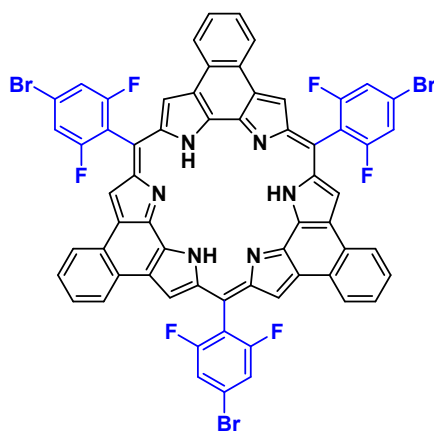

A 1 L round bottomed flask charged with naphthobipyrrole (100 mg, 0.484 mmol, 1 equiv.) and 2,6-dimethylbenzaldehyde (129 mg, 0.58 mmol, 1.2 equiv.). The general procedures were then followed to obtain a crude product. This crude product was purified via silica gel column chromatography (doped with 1% triethylamine) using hexanes: dichloromethane, gradient of 1:1 to 1:2. Finally, recrystallization of the solid from dichloromethane/methanol yielded **NRos-3** as a dark brown solid. **Yield** 21 mg, 18% (procedure A); 37.8 mg, 15% (procedure B). **<sup>1</sup>H NMR** (600 MHz, THF-*d*<sub>8</sub>)  $\delta$  7.27 (d, *J* = 6.8 Hz, 6H), 7.11 (dt, *J* = 7.1, 3.6 Hz, 6H), 6.96 (dd, *J* = 6.0, 3.4 Hz, 6H), 5.15 (s, 6H). **<sup>13</sup>C NMR** (151 MHz, THF-*d*<sub>8</sub>)  $\delta$  132.47, 131.97, 126.95, 124.83, 124.51, 123.78, 120.46, 117.07, 117.04, 116.88, 112.74, 112.60. **<sup>19</sup>F NMR** (376 MHz, THF-*d*<sub>8</sub>)  $\delta$  -109.50. **HRMS** (ESI positive): *m/z* [M+H<sup>+</sup>] Calculated for C<sub>63</sub>H<sub>27</sub>Br<sub>3</sub>F<sub>6</sub>N<sub>6</sub> : 1218.9824, found: 1218.9791. **UV-Vis** (CH<sub>2</sub>Cl<sub>2</sub>):  $\lambda_{\max}$  (nm) (log  $\epsilon$ (dm<sup>3</sup> cm<sup>-1</sup> mol<sup>-1</sup>)): 472 (5.1), 570 (4.8).

### NRos-4

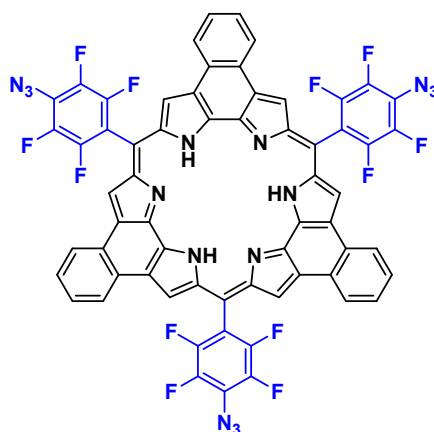

A 1 L round bottomed flask charged with naphthobipyrrole (100 mg, 0.484 mmol, 1 equiv.) and 2,6-dimethylbenzaldehyde (107 mg, 0.58 mmol, 1.2 equiv.). The general procedures were then followed to obtain a crude product. This crude product was purified via silica gel column chromatography (doped with 1% triethylamine) using hexanes: dichloromethane, gradient of 1:1 to 1:2. Finally, recrystallization of the solid from dichloromethane/methanol yielded **NRos-4** as a dark brown solid. **Yield** 23 mg, 12% (procedure A); 31 mg, 16% (procedure B). **<sup>1</sup>H NMR**

(400 MHz, THF- $d_8$ )  $\delta$  7.04 (dt,  $J$  = 6.9, 3.6 Hz, 6H), 6.99 (dt,  $J$  = 5.9, 3.5 Hz, 6H), 5.14 (s, 6H).  $^{13}\text{C}$  NMR (151 MHz, THF- $d_8$ )  $\delta$  146.58, 144.95, 143.50, 141.95, 132.81, 131.33, 127.81, 125.35, 125.16, 122.44, 121.18, 111.31.  $^{19}\text{F}$  NMR (376 MHz, THF- $d_8$ )  $\delta$  -142.30 – -142.58 (m), -152.03 – -152.28 (m). HRMS (ESI positive):  $m/z$   $[\text{M}+\text{H}^+]$  Calculated for  $\text{C}_{63}\text{H}_{21}\text{F}_{12}\text{N}_{15}$ : 1216.1986, found: 1216.1973. UV-Vis ( $\text{CH}_2\text{Cl}_2$ ):  $\lambda_{\text{max}}$  (nm) ( $\log \epsilon(\text{dm}^3 \text{cm}^{-1} \text{mol}^{-1})$ ): 473 (4.8), 585 (4.5).

### NRos-5

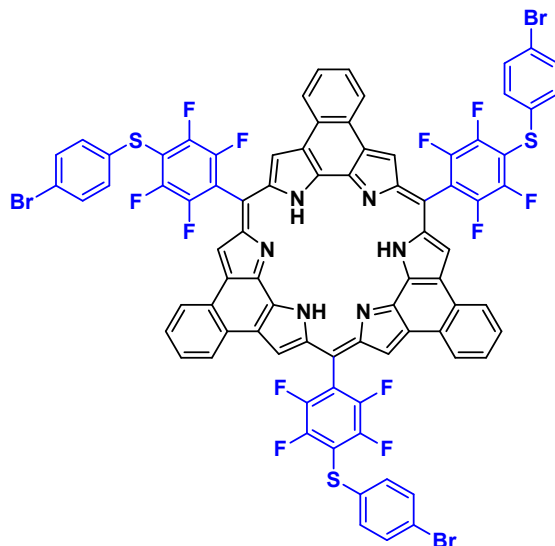

A 1 L round bottomed flask charged with naphthobipyrrole (100 mg, 0.484 mmol, 1 equiv.) and 2,6-dimethylbenzaldehyde (192 mg, 0.58 mmol, 1.2 equiv.). The general procedures were then followed to obtain a crude product. This crude product was purified via silica gel column chromatography (doped with 1% triethylamine) using hexanes: dichloromethane, gradient of 1:1 to 1:2. Finally, recrystallization of the solid from dichloromethane/methanol yielded **NRos-5** as a dark brown solid. Yield 35 mg, 13% (procedure A); 50 mg, 19% (procedure B).  $^1\text{H}$  NMR (400 MHz, THF- $d_8$ )  $\delta$  7.48 (d,  $J$  = 8.2 Hz, 6H), 7.31 (d,  $J$  = 8.2 Hz, 6H), 7.05 (dt,  $J$  = 7.5, 3.7 Hz, 6H), 6.98 (dt,  $J$  = 6.0, 3.7 Hz, 6H), 5.13 (s, 6H).  $^{13}\text{C}$  NMR (151 MHz, THF- $d_8$ )  $\delta$  149.04, 147.39, 145.85, 144.29, 133.61, 133.28, 132.92, 132.22, 130.78, 127.13, 124.63, 124.56, 123.06, 120.51, 116.52, 114.87.  $^{19}\text{F}$  NMR (376 MHz, THF- $d_8$ )  $\delta$  -130.97 (dd,  $J$  = 24.7, 12.0 Hz), -138.86 (dd,  $J$  = 24.7, 11.9 Hz). HRMS (ESI positive):  $m/z$   $[\text{M}+\text{H}^+]$  Calculated for  $\text{C}_{81}\text{H}_{33}\text{Br}_3\text{F}_{12}\text{N}_6\text{S}_3$ : 1650.9360, found: 1650.9456. UV-Vis ( $\text{CH}_2\text{Cl}_2$ ):  $\lambda_{\text{max}}$  (nm) ( $\log \epsilon(\text{dm}^3 \text{cm}^{-1} \text{mol}^{-1})$ ): 470 (4.9), 572 (4.7).

### NRos-6

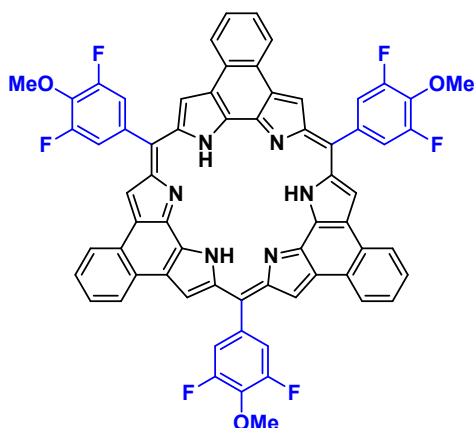

A 1 L round bottomed flask charged with naphthobipyrrole (100 mg, 0.484 mmol, 1 equiv.) and 2,6-dimethylbenzaldehyde (100 mg, 0.58 mmol, 1.2 equiv.). The general procedures were then followed to obtain a crude product. This crude product was purified via silica gel column chromatography (doped with 1% triethylamine) using hexanes: dichloromethane, gradient 1:2 to 1:3. Finally, recrystallization of the solid from dichloromethane/methanol yielded **NRos-6** as a dark brown solid. **Yield** 8.6 mg, 7% (procedure A); 24.3 mg, 15% (procedure B). **<sup>1</sup>H NMR** (600 MHz, THF-*d*<sub>8</sub>) δ 6.97 (d, *J* = 7.1 Hz, 6H), 6.94 – 6.87 (m, 6H), 6.64 (d, *J* = 8.5 Hz, 6H), 5.20 (s, 6H), 3.92 (s, 9H). **<sup>13</sup>C NMR** (151 MHz, THF-*d*<sub>8</sub>) δ 157.31, 155.66, 151.13, 150.14, 138.07, 132.22, 131.25, 126.84, 125.19, 124.31, 121.92, 113.88, 62.13. **<sup>19</sup>F NMR** (376 MHz, THF-*d*<sub>8</sub>) δ -127.16. **HRMS** (ESI positive): *m/z* [M+H<sup>+</sup>] Calculated for C<sub>66</sub>H<sub>36</sub>F<sub>6</sub>N<sub>6</sub>O<sub>3</sub> : 1075.2826, found: 1075.2795. **UV-Vis** (CH<sub>2</sub>Cl<sub>2</sub>): λ<sub>max</sub> (nm) (log ε(dm<sup>3</sup> cm<sup>-1</sup> mol<sup>-1</sup>)): 481 (5.0), 575 (4.7).

### NRos-7

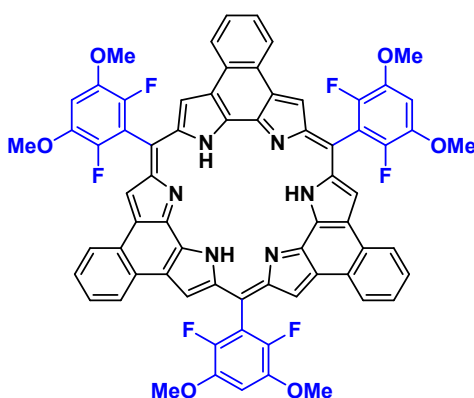

A 1 L round bottomed flask charged with naphthobipyrrole (100 mg, 0.484 mmol, 1 equiv.) and 2,6-dimethylbenzaldehyde (118 mg, 0.58 mmol, 1.2 equiv.). The general procedures were then followed to obtain a crude product. This crude product was purified via silica gel column chromatography (doped with 1% triethylamine) using hexanes: dichloromethane, gradient 1:2 to 1:4. Finally, recrystallization of the solid from dichloromethane/methanol yielded **NRos-7** as a dark brown solid. **Yield** 7.5 mg, 4% (procedure A); 22 mg, 12% (procedure B). **<sup>1</sup>H NMR** (600 MHz, THF-*d*<sub>8</sub>) δ 7.09 (dd, *J* = 6.0, 3.4 Hz, 6H), 6.95 (dd, *J* = 6.0, 3.4 Hz, 6H), 6.81 – 6.76 (m, 3H), 5.14 (s, 6H), 3.81 (s, 18H). **<sup>13</sup>C NMR** (151 MHz, THF-*d*<sub>8</sub>) δ 150.72, 145.01, 144.33, 142.73, 133.81, 131.69, 126.73, 124.96, 124.45, 120.58, 114.47, 101.97, 57.37. **<sup>19</sup>F NMR** (376 MHz, THF-*d*<sub>8</sub>) δ -143.29 (d, *J* = 8.1 Hz). **HRMS** (ESI positive): *m/z* [M+H<sup>+</sup>] Calculated for C<sub>69</sub>H<sub>42</sub>F<sub>6</sub>N<sub>6</sub>O<sub>3</sub>: 1165.3143, found: 1165.3145. **UV-Vis** (CH<sub>2</sub>Cl<sub>2</sub>): λ<sub>max</sub> (nm) (log ε(dm<sup>3</sup> cm<sup>-1</sup> mol<sup>-1</sup>)): 476 (5.1), 575 (4.8).



## NRos-8

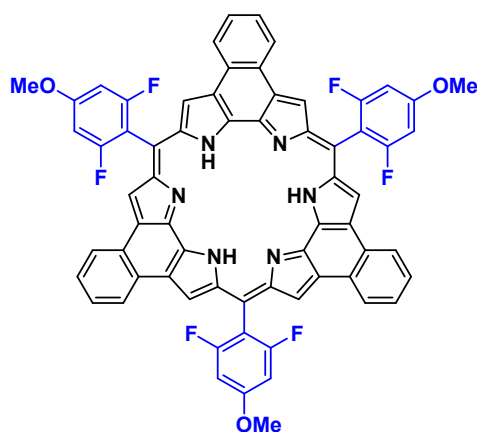

A 1 L round bottomed flask charged with naphthobipyrrole (100 mg, 0.484 mmol, 1 equiv.) and 2,6-dimethylbenzaldehyde (100 mg, 0.58 mmol, 1.2 equiv.). The general procedures were then followed to obtain a crude product. This crude product was purified via silica gel column chromatography (doped with 1% triethylamine) using hexanes: dichloromethane, gradient 1:2 to 1:3. Finally, recrystallization of the solid from dichloromethane/methanol yielded **NRos-8** as a dark brown solid. **Yield** 12 mg, 7% (procedure A); 26 mg, 15% (procedure B). **<sup>1</sup>H NMR** (600 MHz, THF-*d*<sub>8</sub>) δ 7.11 (dd, *J* = 6.1, 3.3 Hz, 6H), 6.96 (dd, *J* = 6.0, 3.4 Hz, 6H), 6.56 (d, *J* = 9.3 Hz, 6H), 5.20 (s, 6H), 3.77 (s, 9H). **<sup>13</sup>C NMR** (151 MHz, THF-*d*<sub>8</sub>) δ 162.92, 162.59, 161.01, 133.82, 131.62, 126.76, 125.00, 124.39, 120.63, 105.40, 99.27, 99.08, 56.55. **<sup>19</sup>F NMR** (376 MHz, THF-*d*<sub>8</sub>) δ -112.26. **HRMS** (ESI positive): *m/z* [M+H<sup>+</sup>] Calculated for C<sub>66</sub>H<sub>36</sub>F<sub>6</sub>N<sub>6</sub>O<sub>3</sub> : 1075.2826, found: 1075.2824. **UV-Vis** (CH<sub>2</sub>Cl<sub>2</sub>): λ<sub>max</sub> (nm) (log ε(dm<sup>3</sup> cm<sup>-1</sup> mol<sup>-1</sup>)): 481 (5.0), 585 (4.7).

### 3. NMR Spectra

#### 2,6-Difluoro-3,5-dimethoxybenzaldehyde

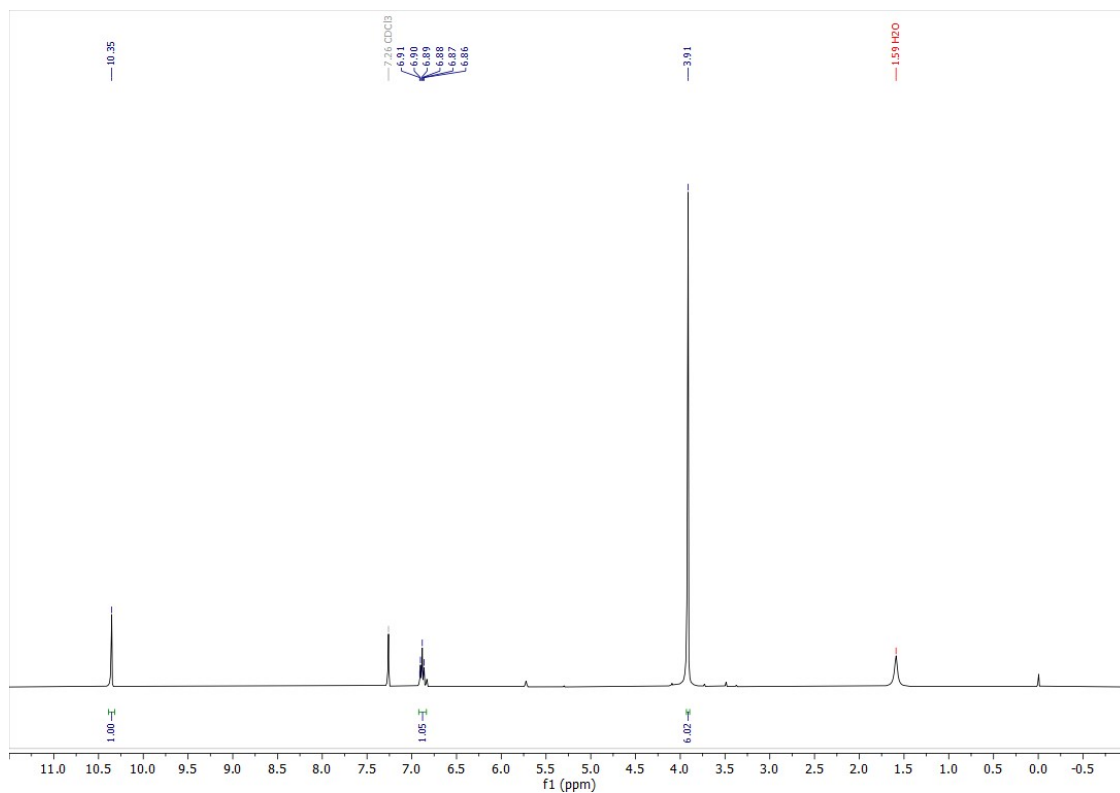

Figure S3.1. <sup>1</sup>H NMR spectrum (CDCl<sub>3</sub>) of 2,6-difluoro-3,5-dimethoxybenzaldehyde

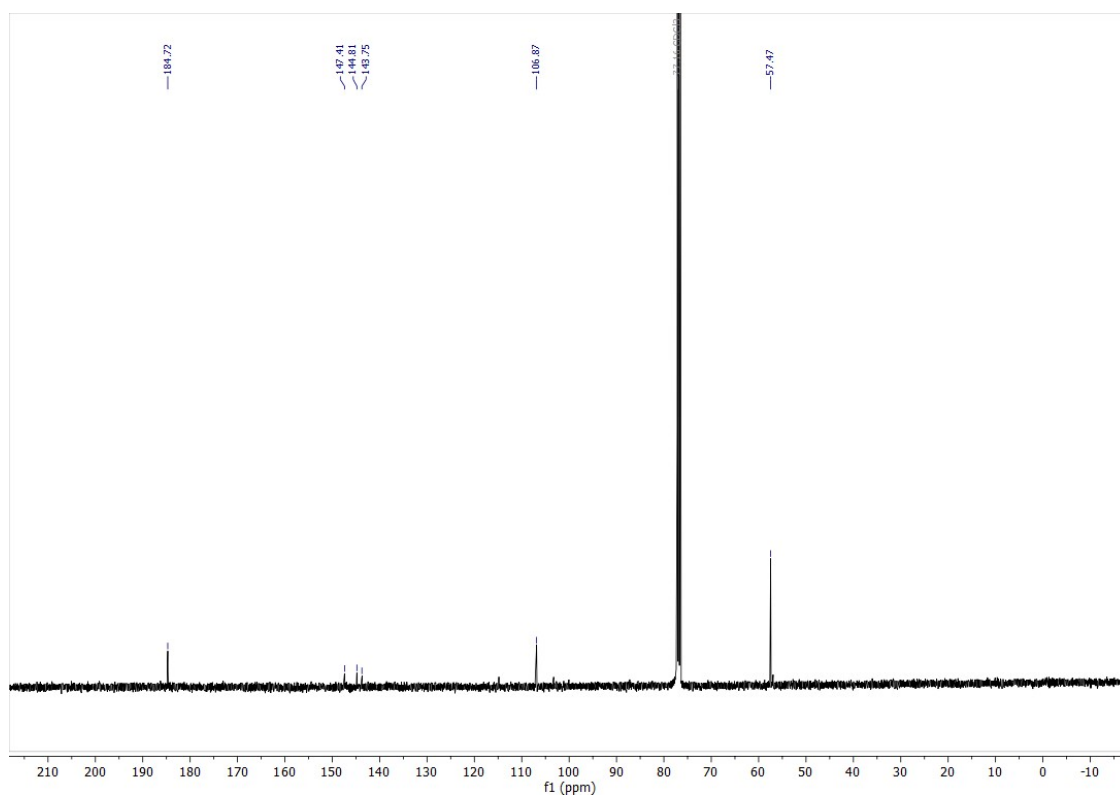

Figure S3.2. <sup>13</sup>C NMR spectrum (CDCl<sub>3</sub>) of 2,6-difluoro-3,5-dimethoxybenzaldehyde

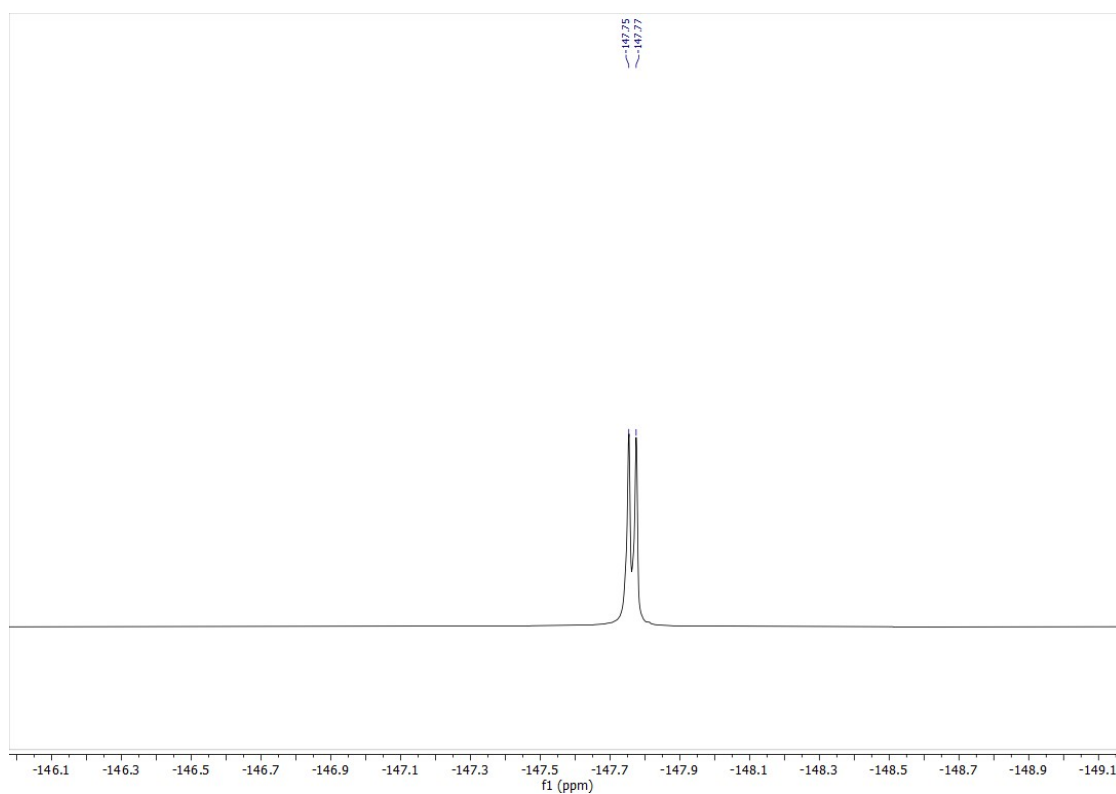

**Figure S3.3.**  $^{19}\text{F}$  NMR spectrum ( $\text{CDCl}_3$ ) of **2,6-difluoro-3,5-dimethoxybenzaldehyde 4-((4-bromophenyl)thio)-2,3,5,6-tetrafluorobenzaldehyde**

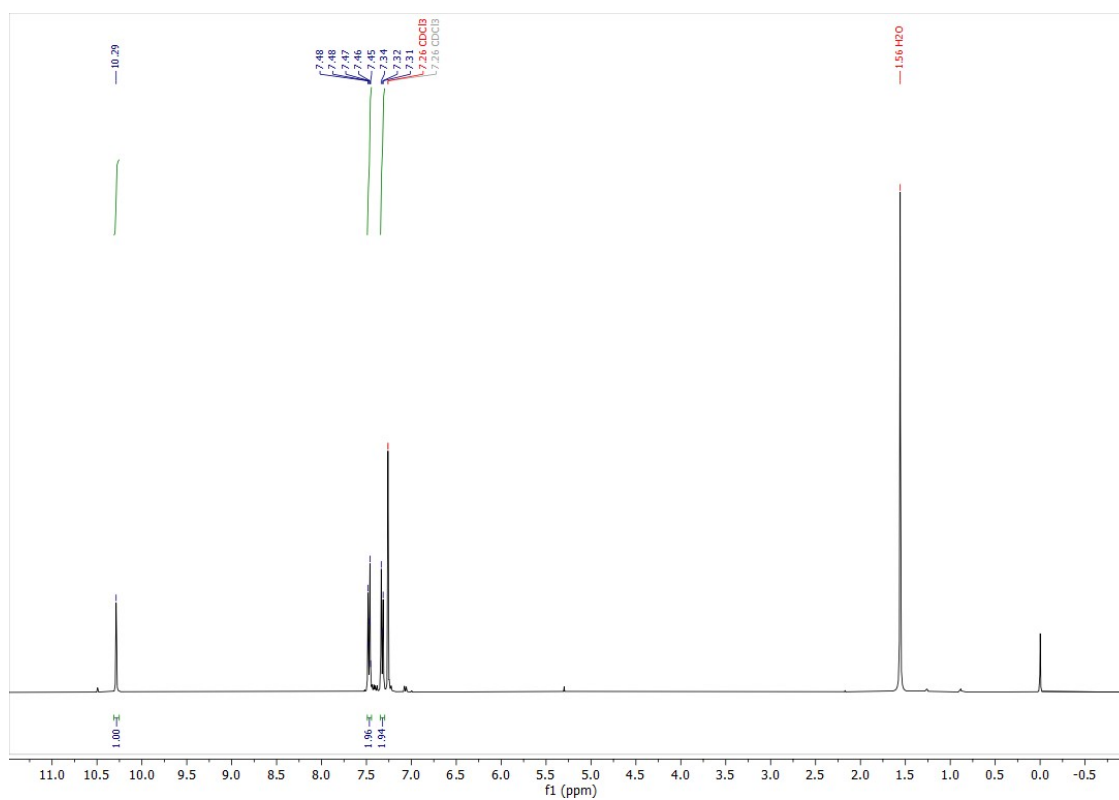

**Figure S3.4.**  $^1\text{H}$  NMR spectrum ( $\text{CDCl}_3$ ) of **4-((4-bromophenyl)thio)-2,3,5,6-tetrafluorobenzaldehyde**

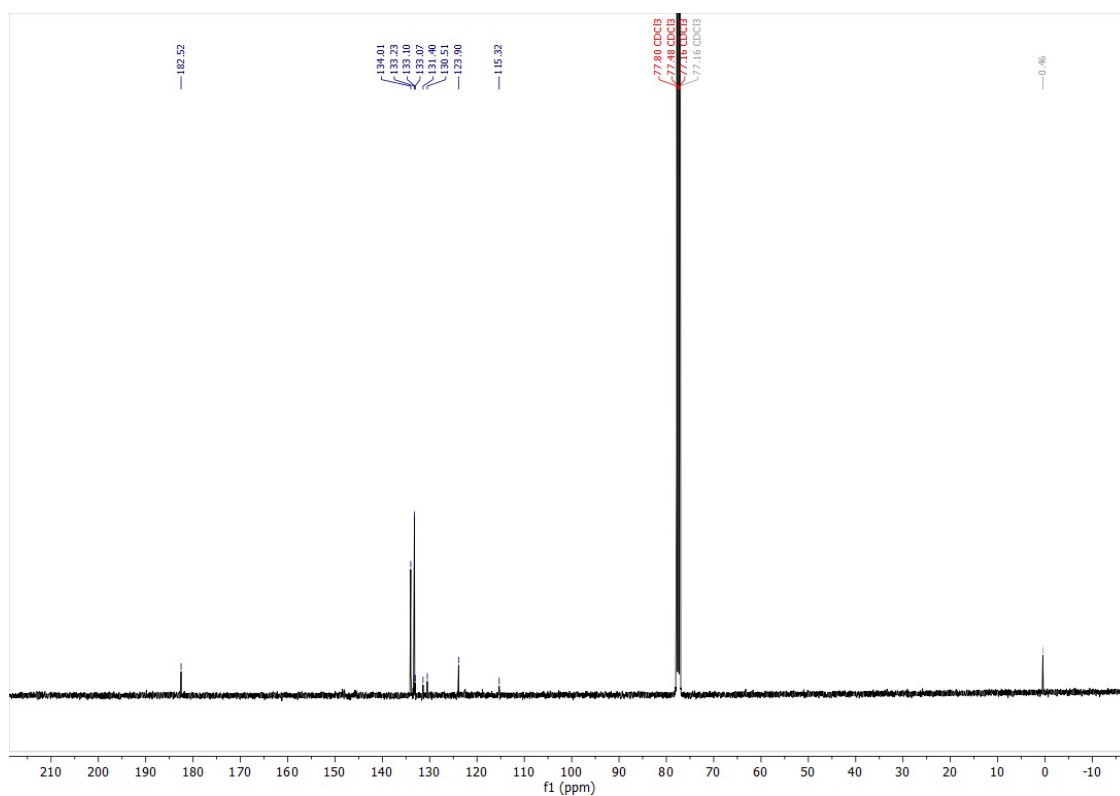

**Figure S3.5.**  $^{13}\text{C}$  NMR spectrum ( $\text{CDCl}_3$ ) of 4-((4-bromophenyl)thio)-2,3,5,6-tetrafluorobenzaldehyde

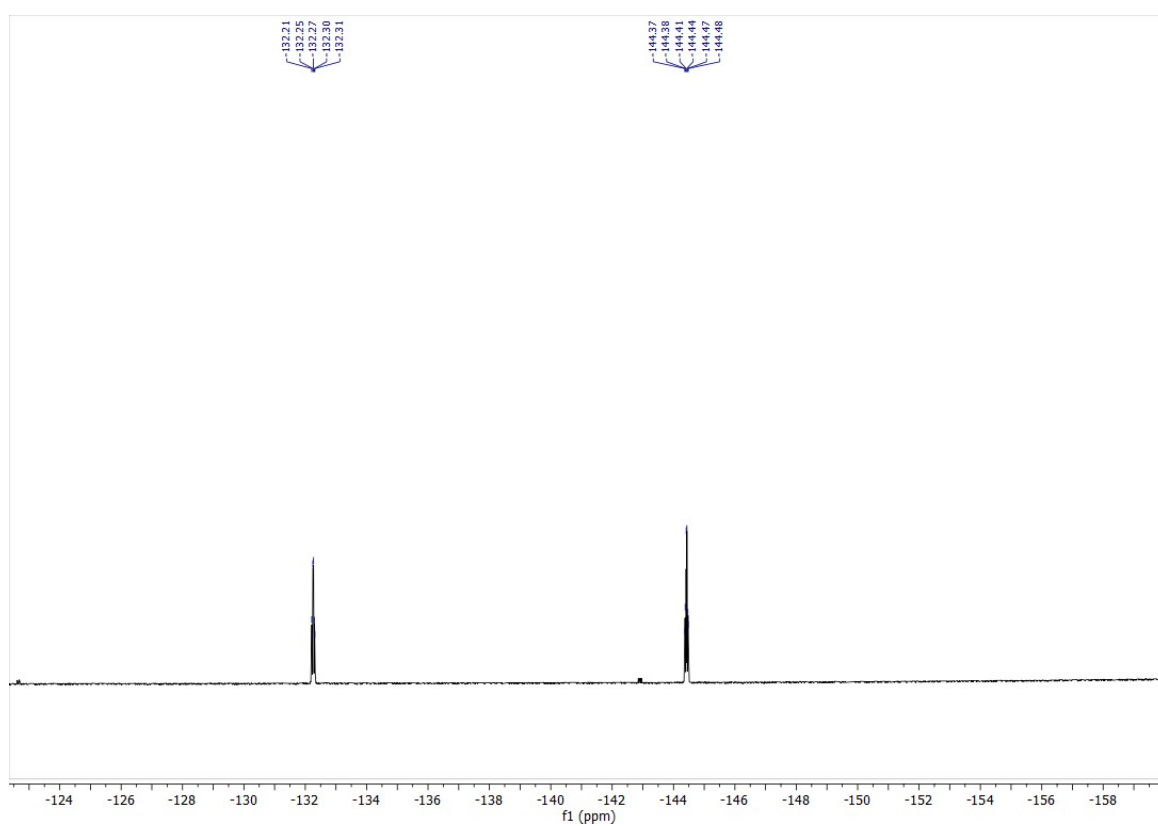

**Figure S3.6.**  $^{19}\text{F}$  NMR spectrum ( $\text{CDCl}_3$ ) of 4-((4-bromophenyl)thio)-2,3,5,6-tetrafluorobenzaldehyde

## NRos-1

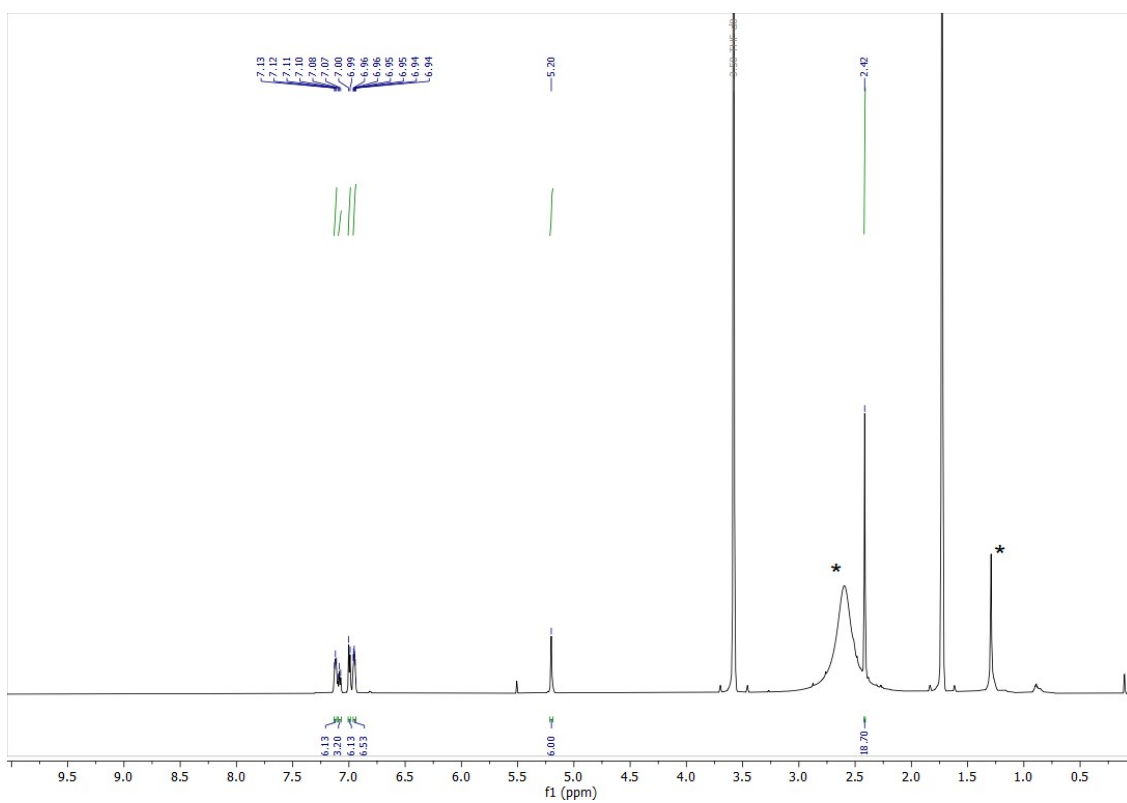

**Figure S3.7.** <sup>1</sup>H NMR spectrum (THF-*d*<sub>8</sub>) of NRos-1

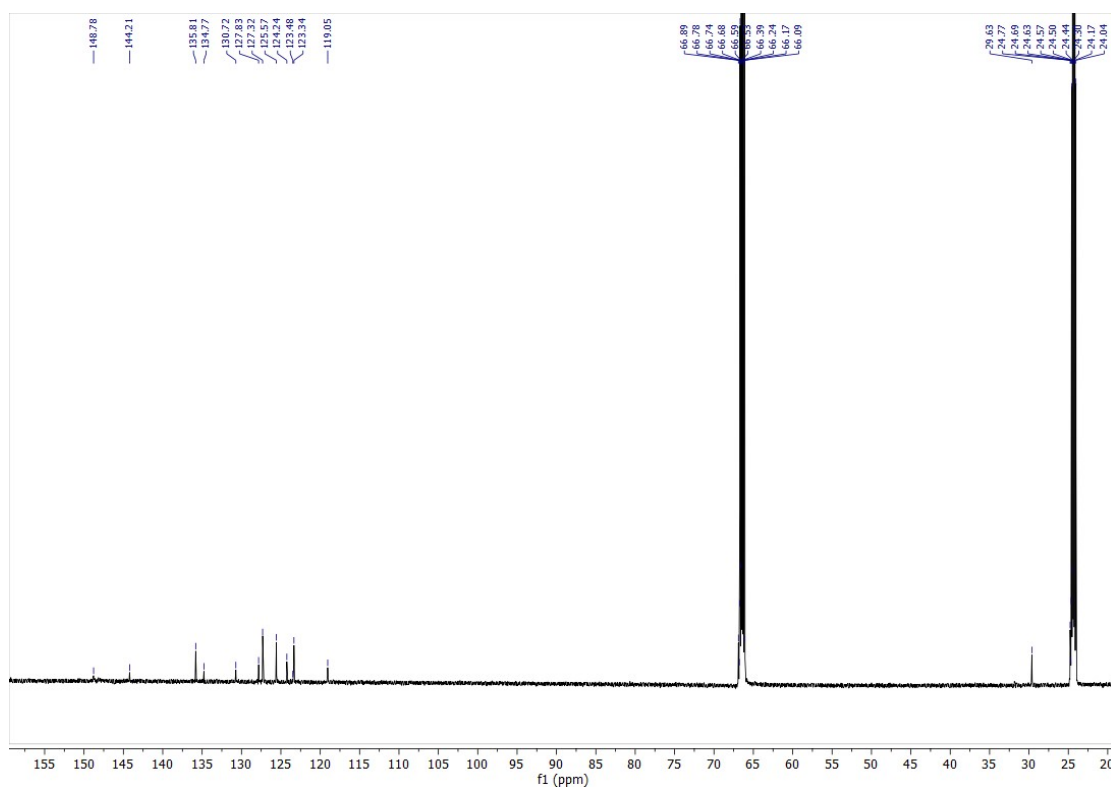

**Figure S3.8.** <sup>13</sup>C NMR (THF-*d*<sub>8</sub>) NRos-1

## NRos-2

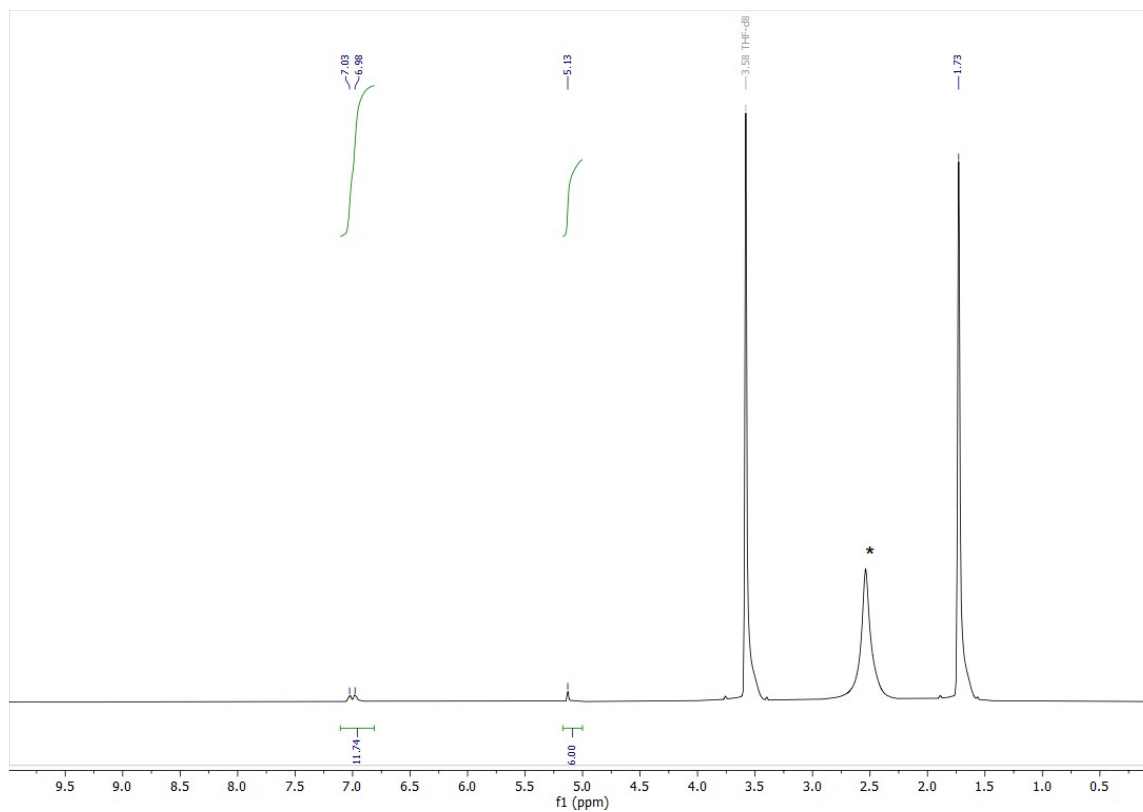

**Figure S3.9.**  $^1\text{H}$  NMR spectrum ( $\text{THF-}d_8$ ) of NRos-2

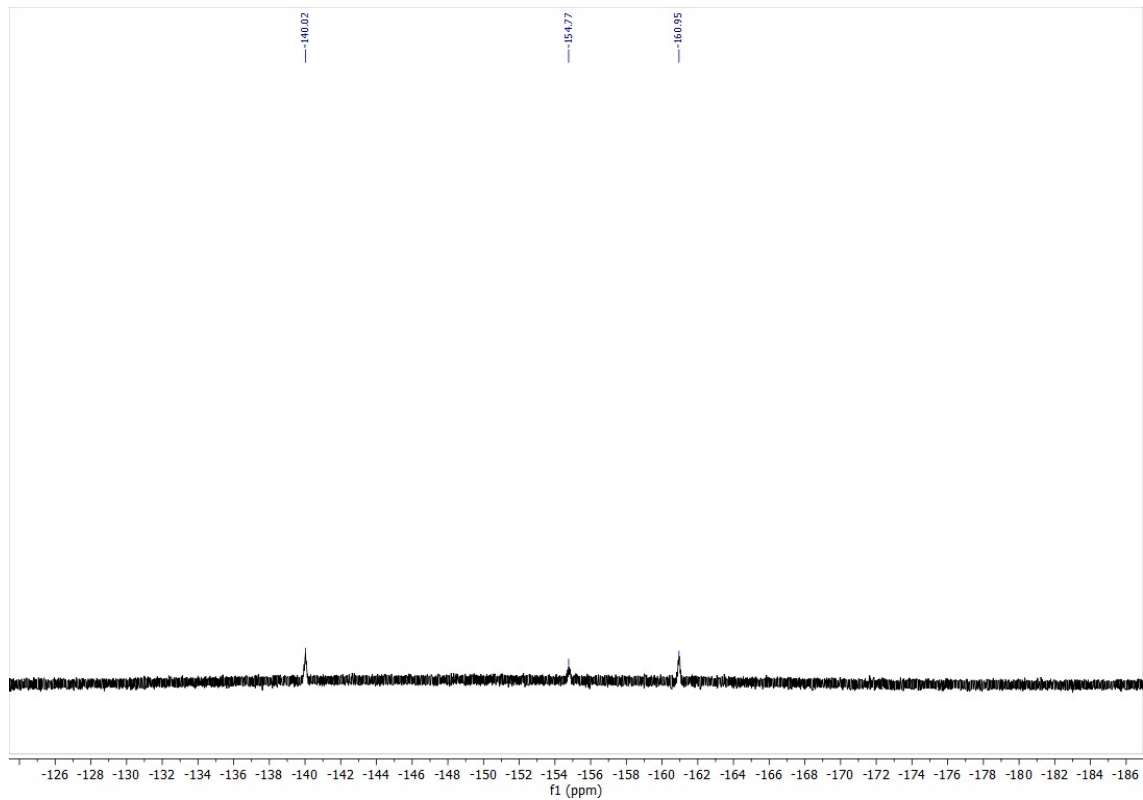

**Figure S3.10.**  $^{19}\text{F}$  NMR spectrum ( $\text{THF-}d_8$ ) of NRos-2

### NRos-3

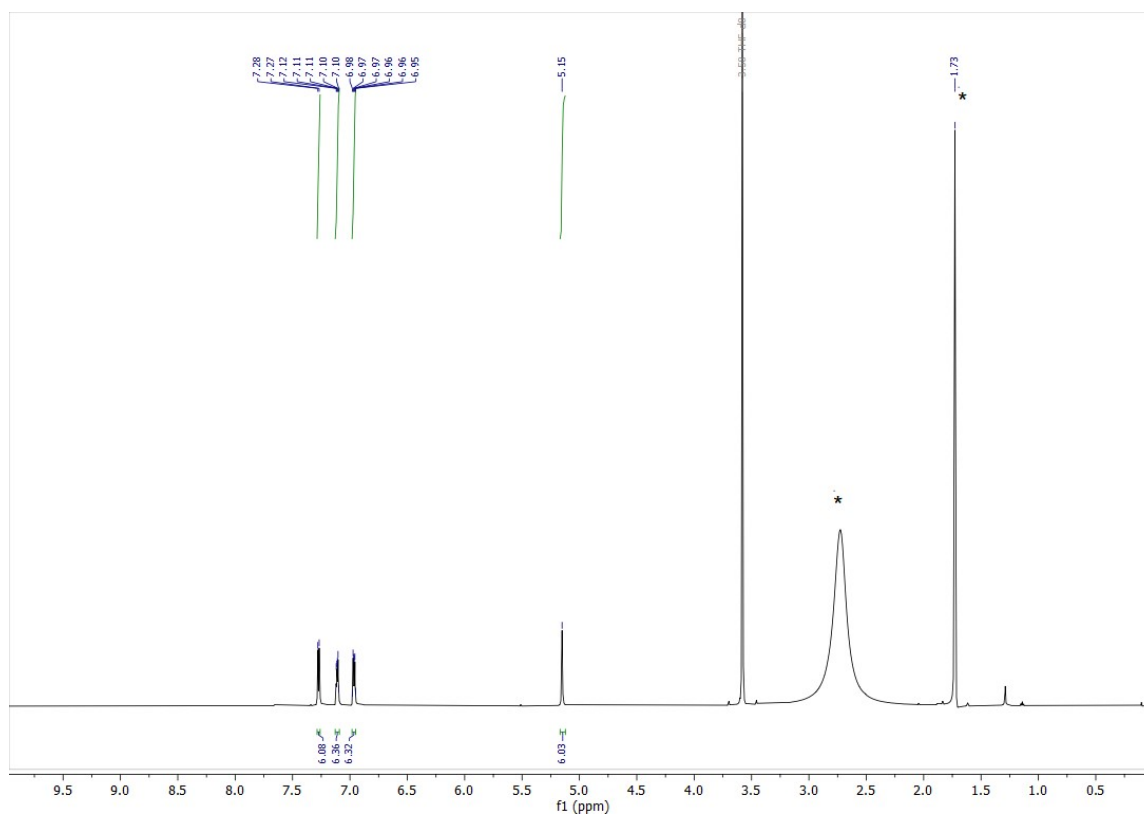

**Figure S3.11.** <sup>1</sup>H NMR spectrum (THF-*d*<sub>8</sub>) of NRos-3

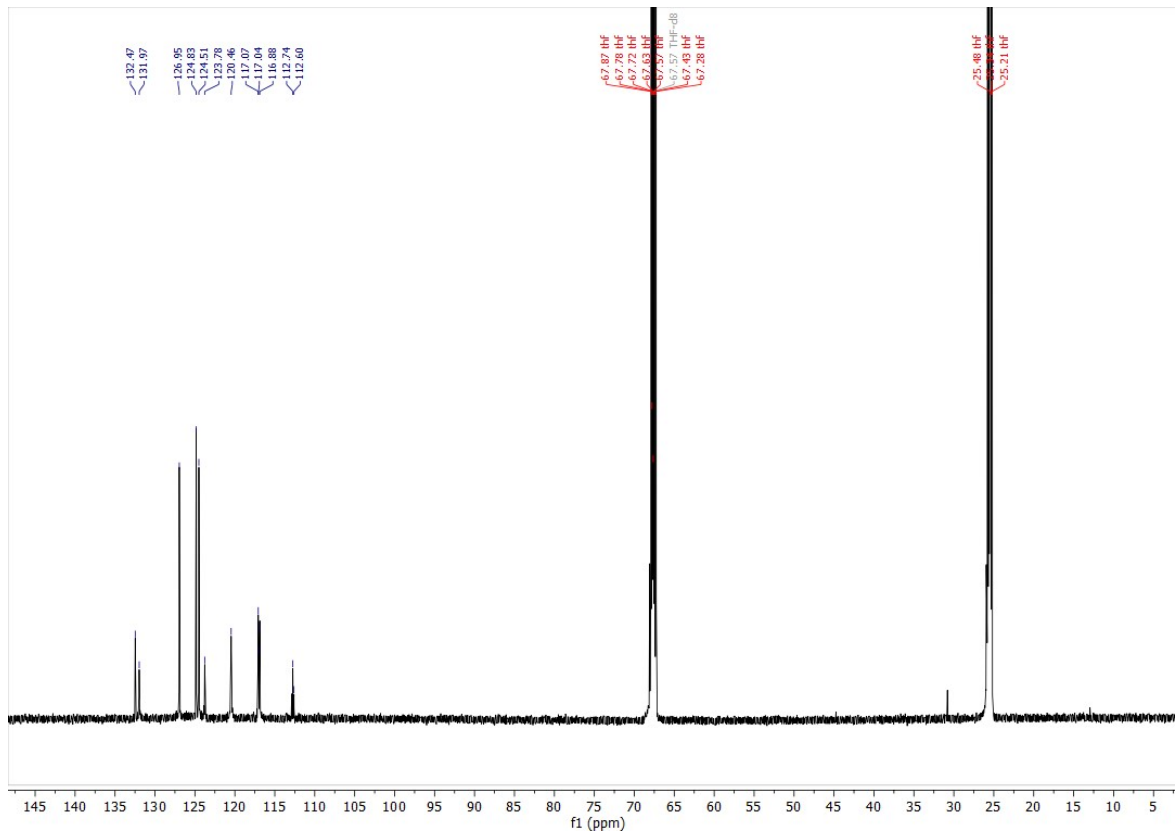

**Figure S3.12.** <sup>13</sup>C NMR spectrum (THF-*d*<sub>8</sub>) of NRos-3

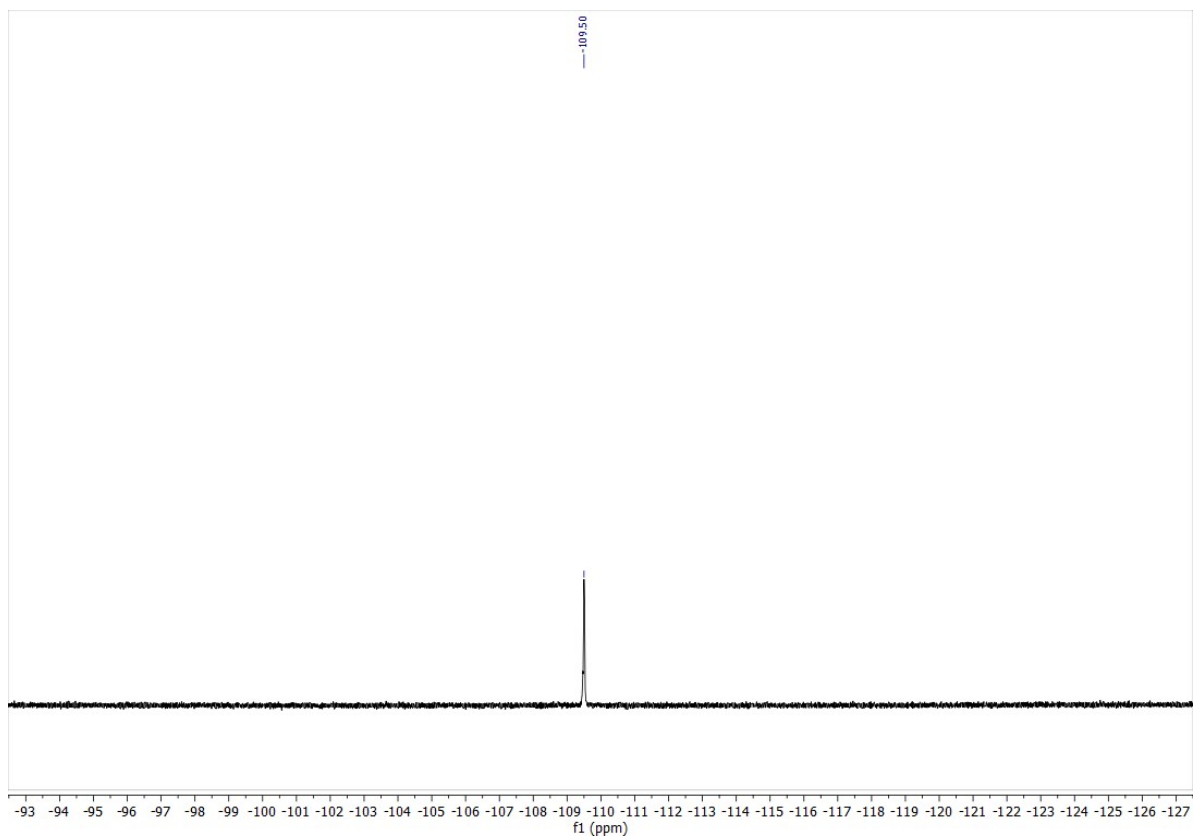

**Figure S3.13.**  $^{19}\text{F}$  NMR spectrum ( $\text{THF-}d_8$ ) of NRos-3

**NRos-4**

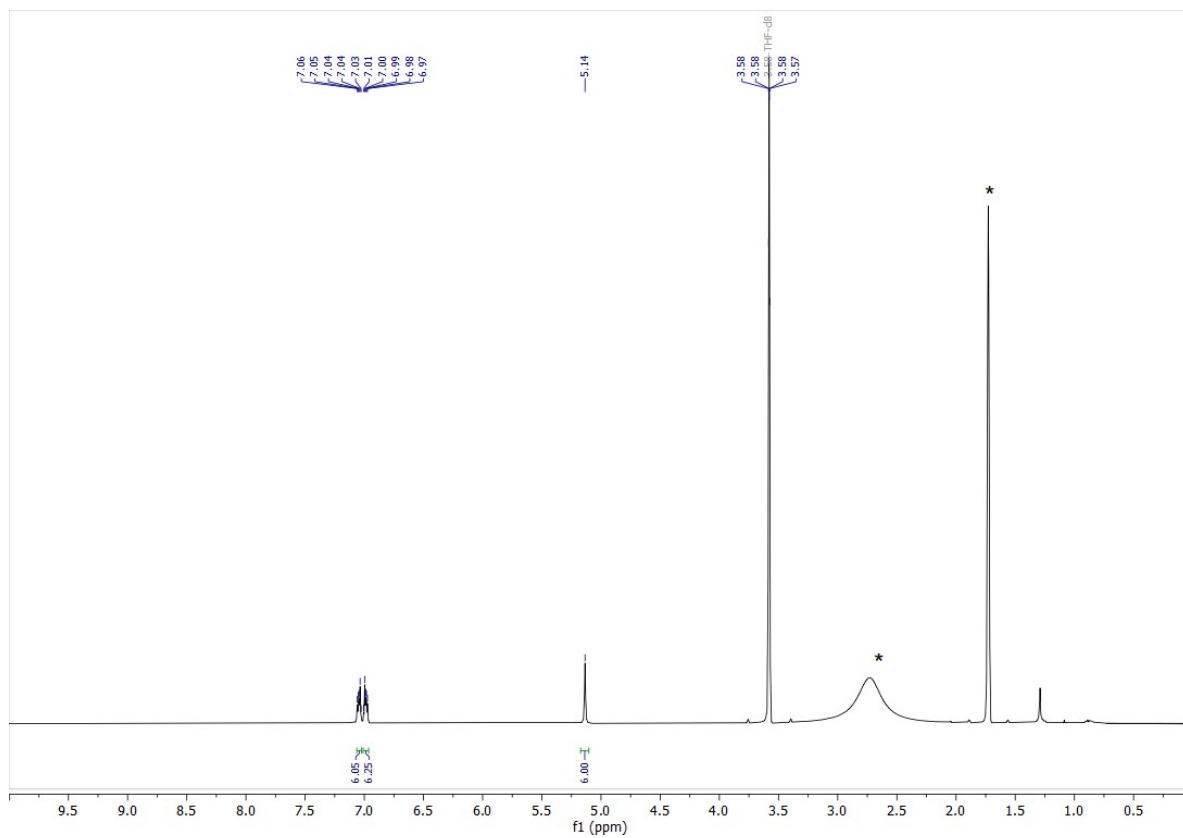

**Figure S3.14.**  $^1\text{H}$  NMR spectrum ( $\text{THF-}d_8$ ) of NRos-4



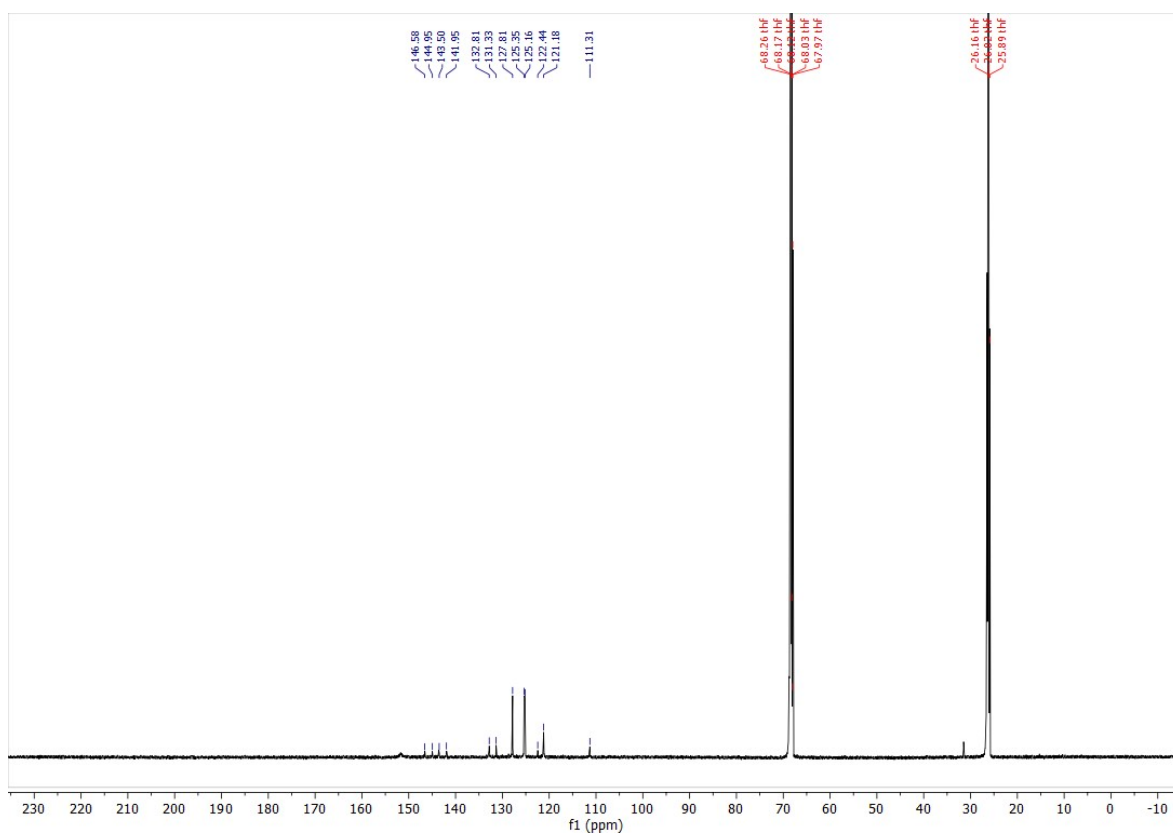

Figure S3.15.  $^{13}\text{C}$  NMR spectrum ( $\text{THF-}d_8$ ) of NRos-4

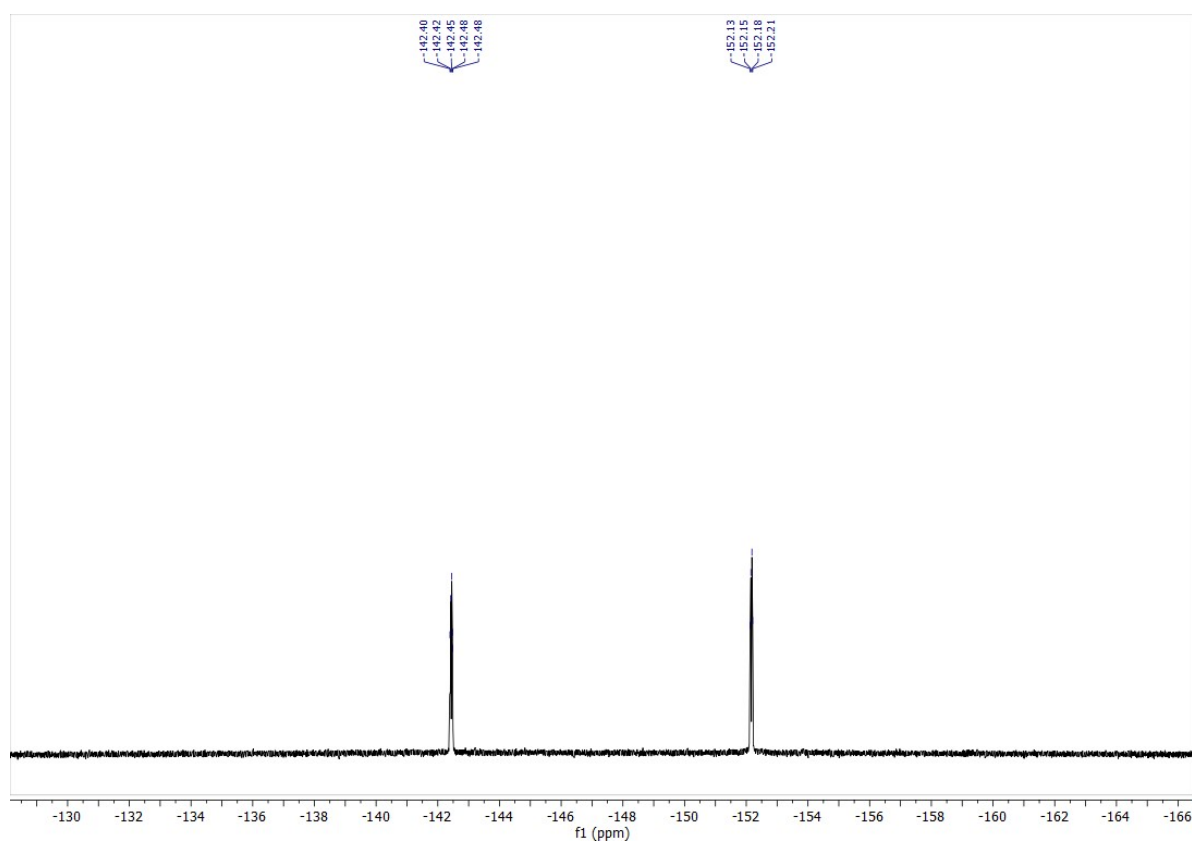

Figure S3.16.  $^{19}\text{F}$  NMR spectrum ( $\text{THF-}d_8$ ) of NRos-4

## NRos-5

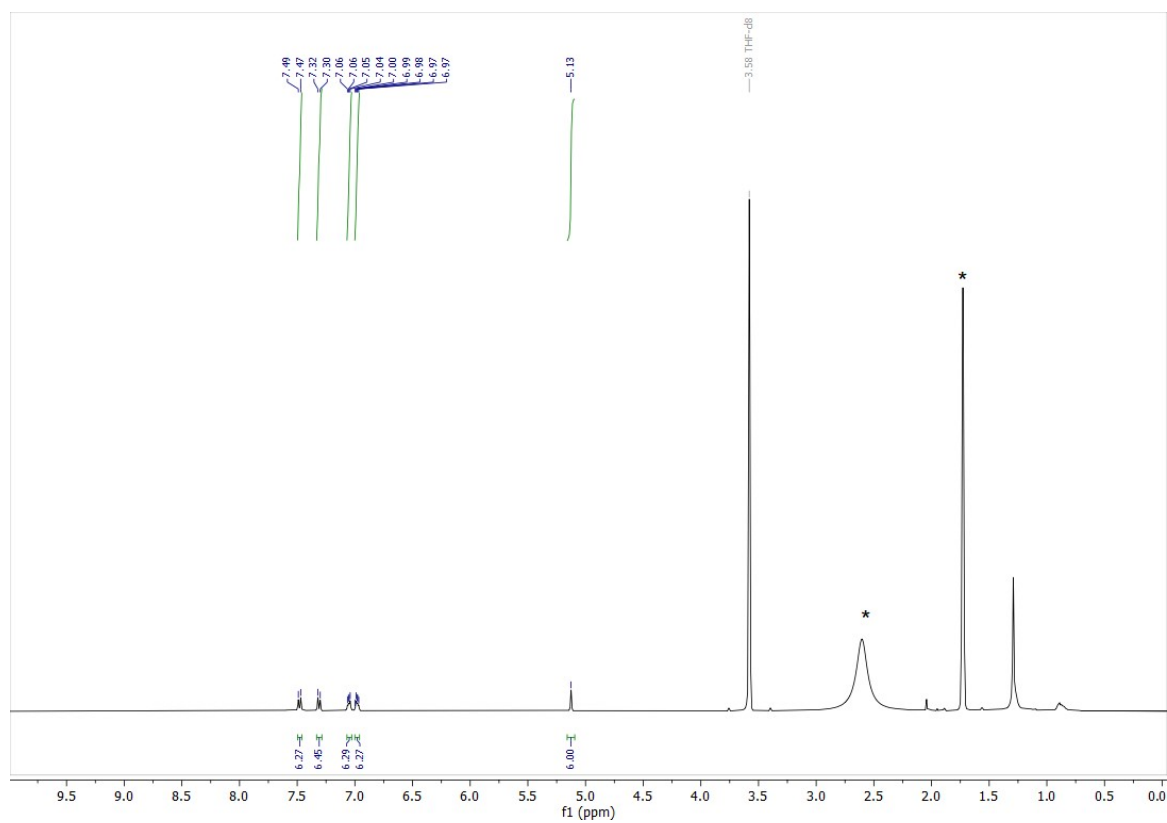

Figure S3.17.  $^1\text{H}$  NMR spectrum (THF- $d_8$ ) of NRos-5

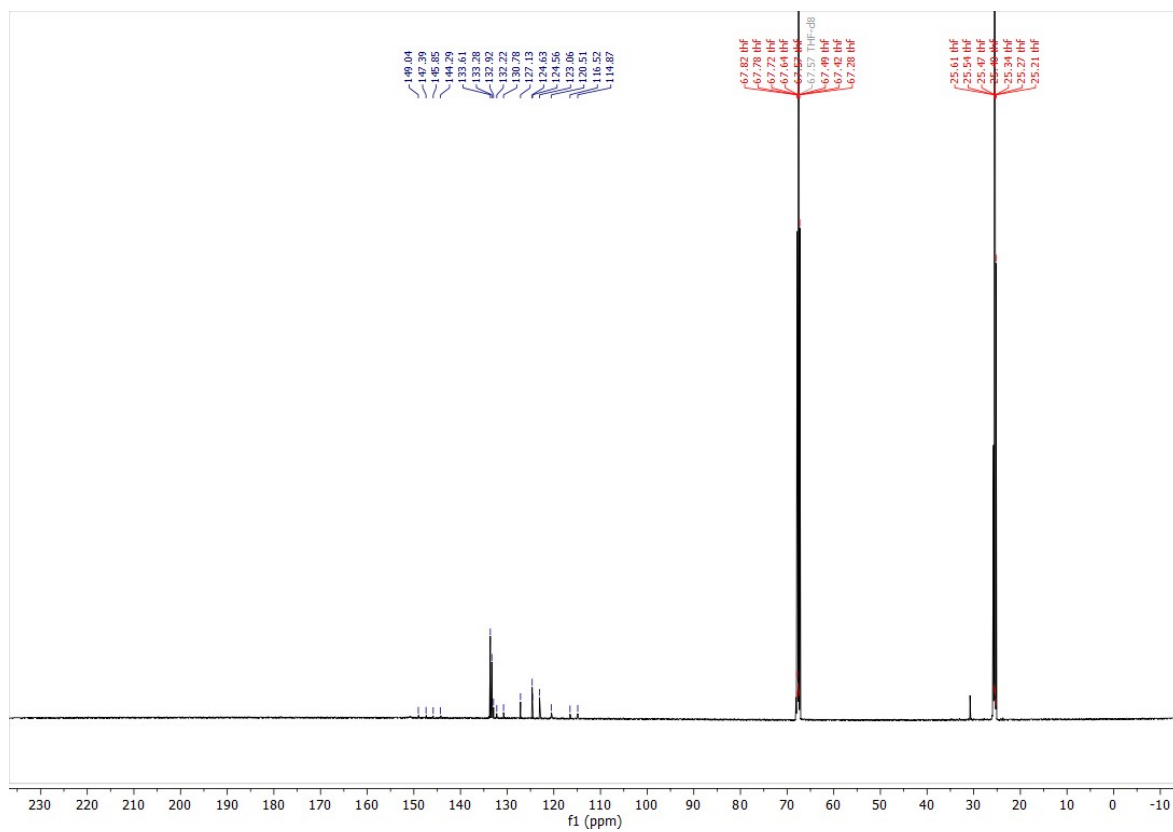

Figure S3.18.  $^{13}\text{C}$  NMR spectrum (THF- $d_8$ ) of NRos-5

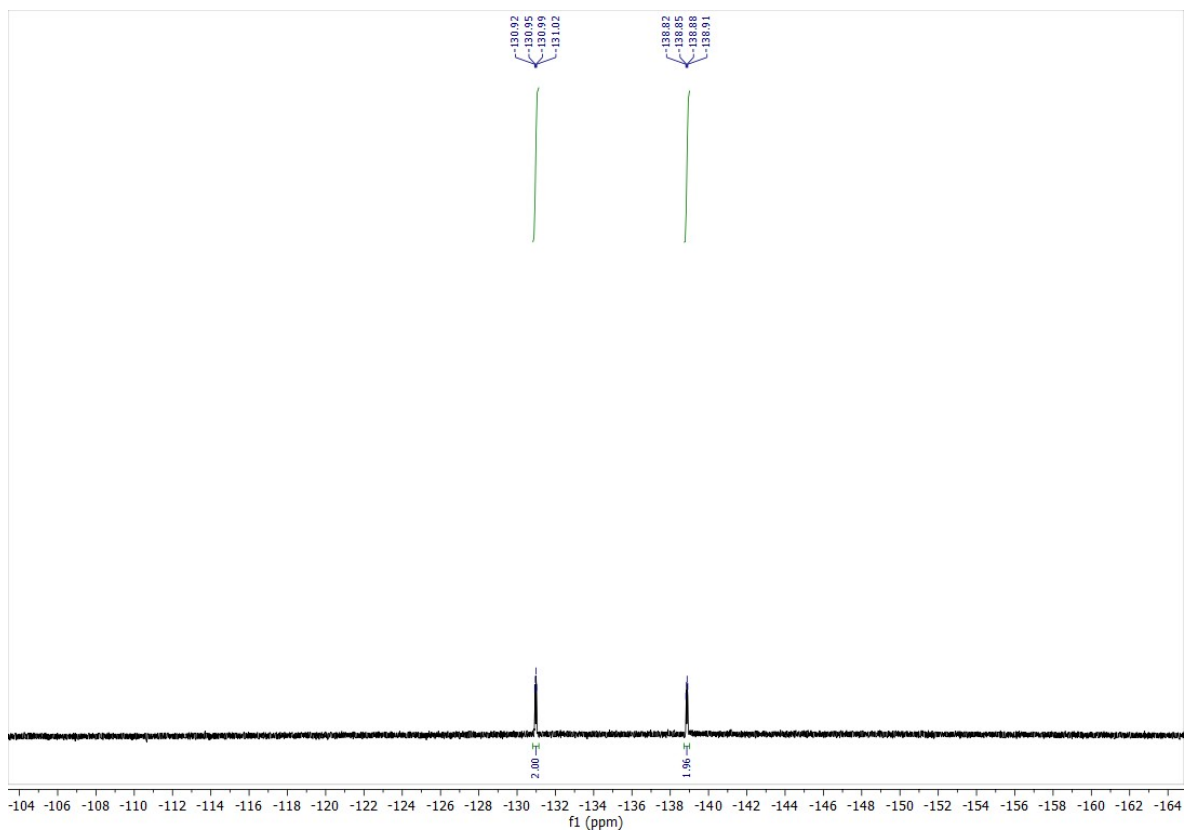

Figure S3.19.  $^{19}\text{F}$  NMR spectrum ( $\text{THF-}d_8$ ) of NRos-5

**NRos-6**

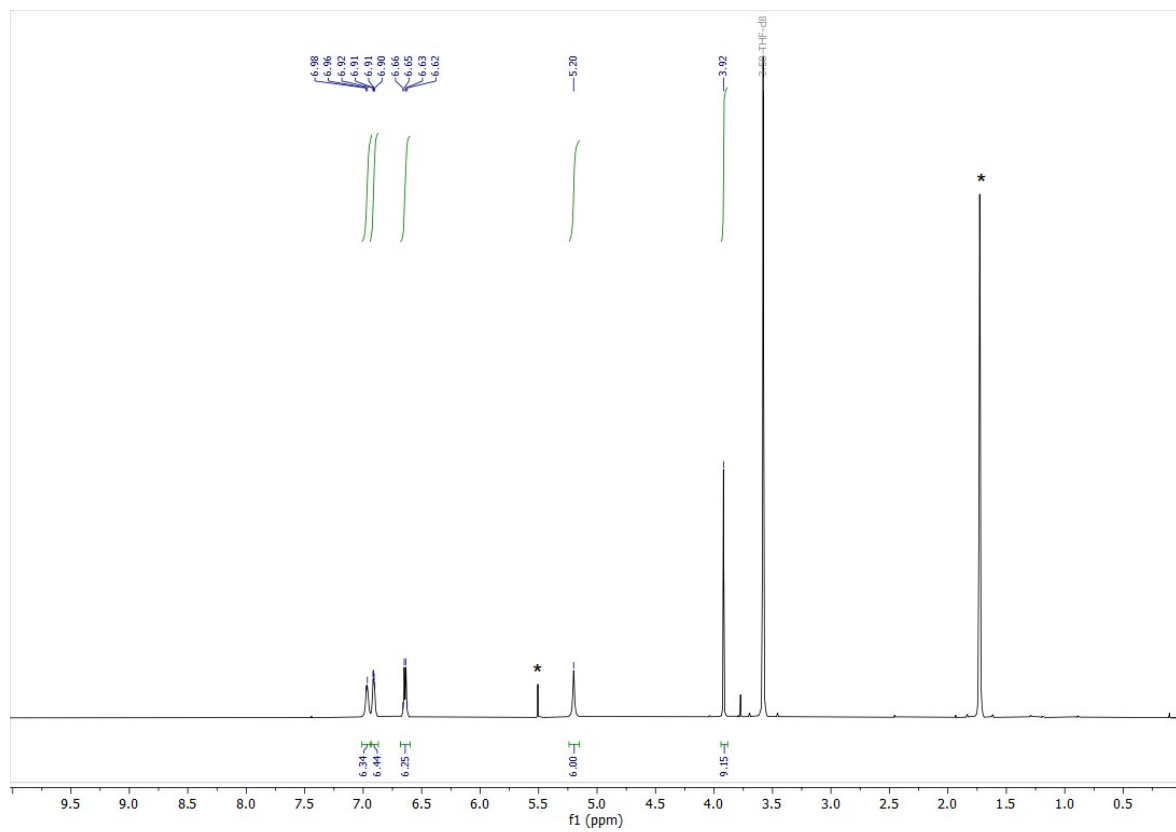

Figure S3.20.  $^1\text{H}$  NMR spectrum ( $\text{THF-}d_8$ ) of NRos-6

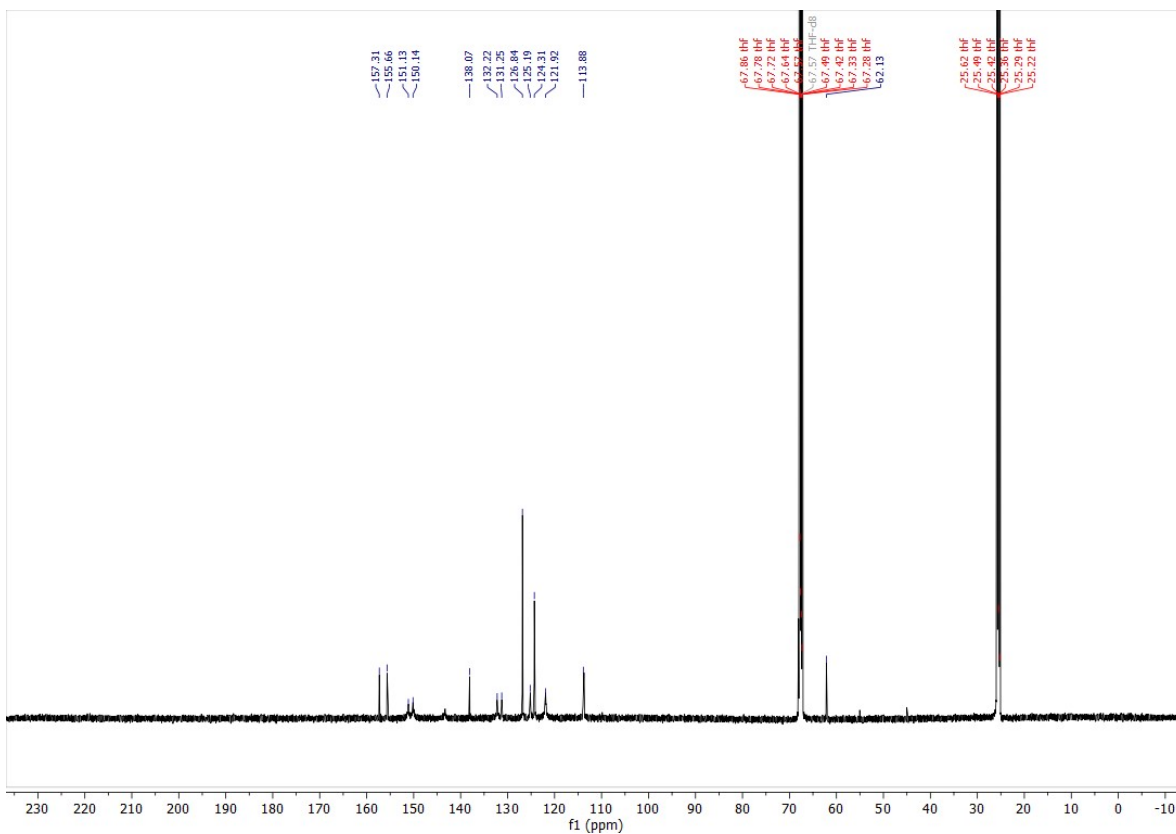

Figure S3.21.  $^{13}\text{C}$  NMR spectrum ( $\text{THF-}d_8$ ) of NRos-6

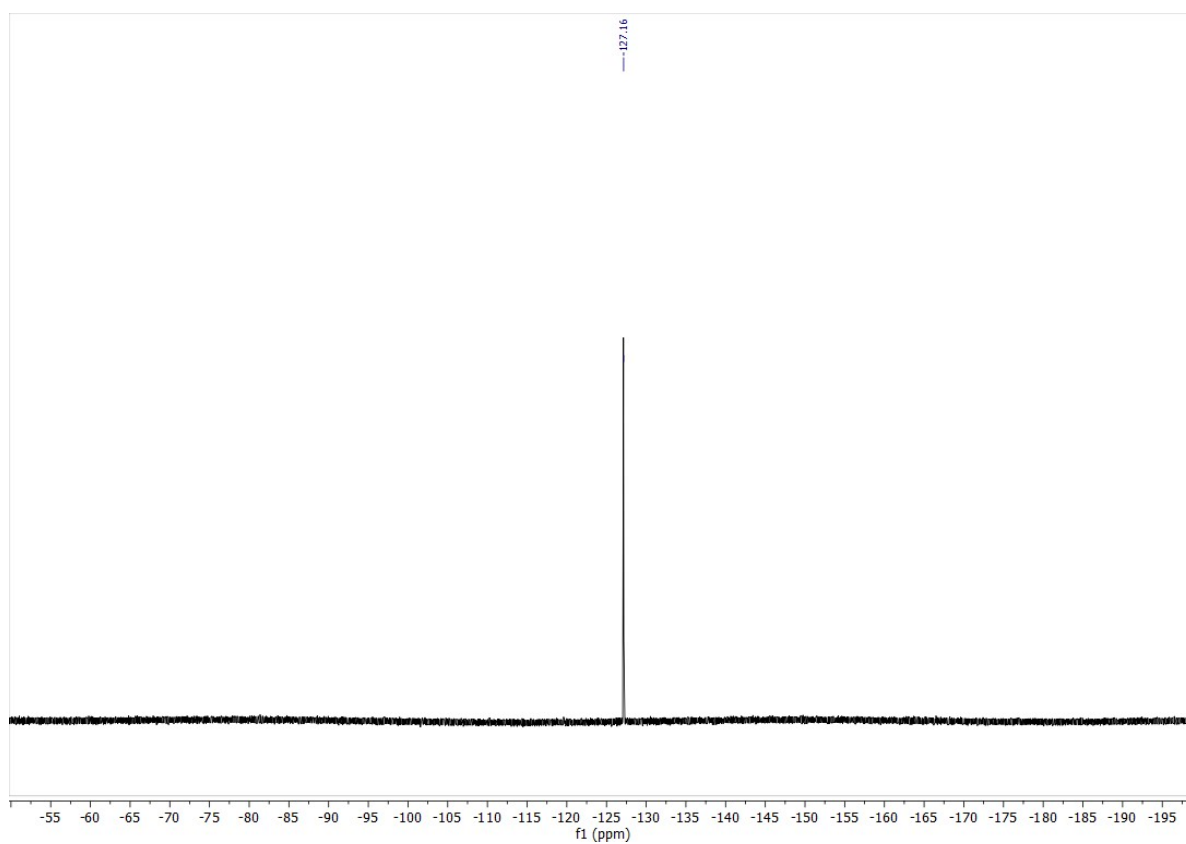

Figure S3.22.  $^{19}\text{F}$  NMR spectrum ( $\text{THF-}d_8$ ) of NRos-6

## NRos-7

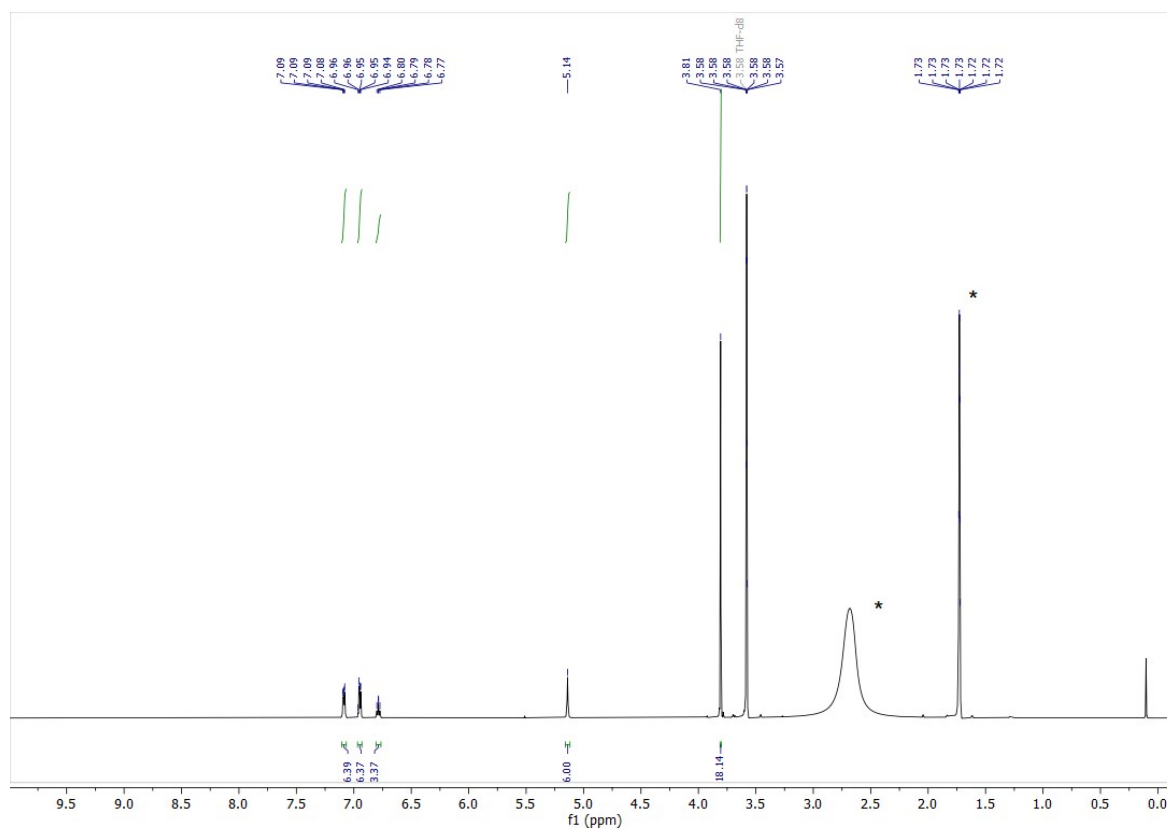

Figure S3.23. <sup>1</sup>H NMR spectrum (THF-*d*<sub>8</sub>) of NRos-7

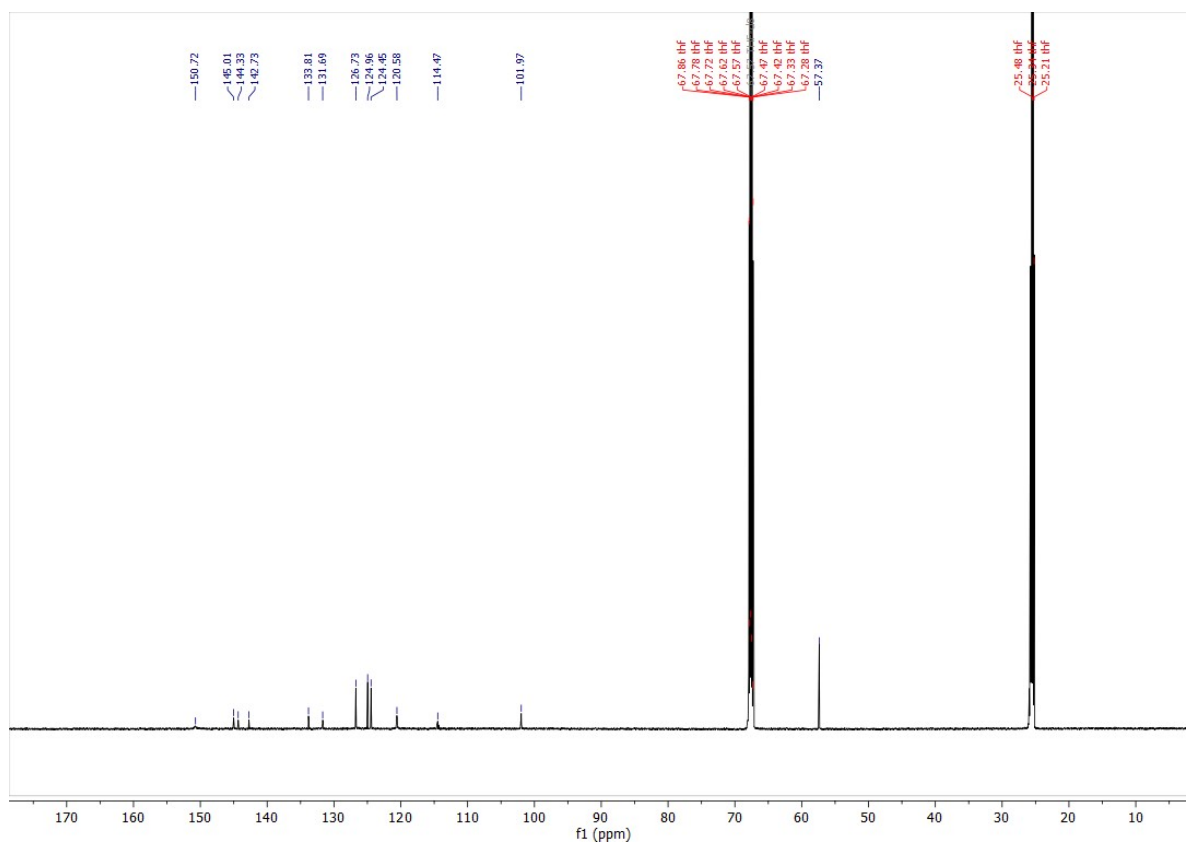

Figure S3.24. <sup>13</sup>C NMR spectrum (THF-*d*<sub>8</sub>) of NRos-7

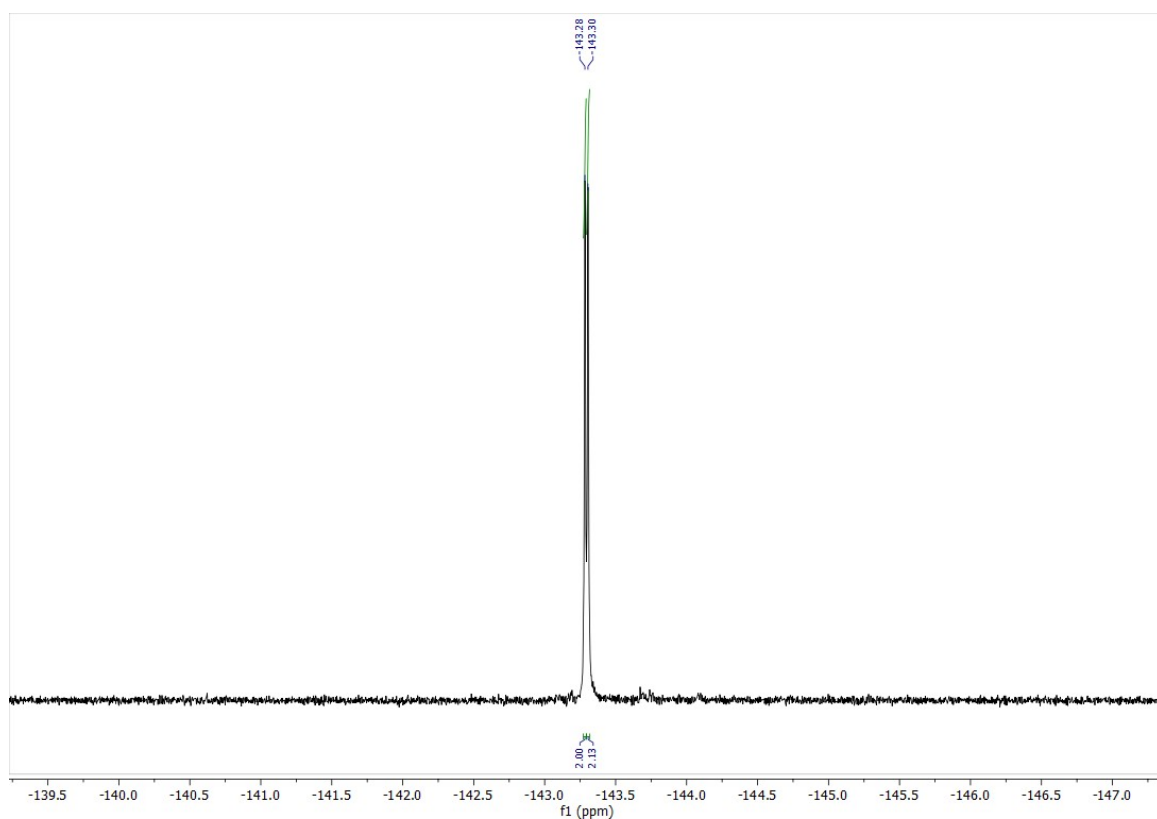

Figure S3.25.  $^{19}\text{F}$  NMR spectrum ( $\text{THF-}d_8$ ) of NRos-7

### NRos-8

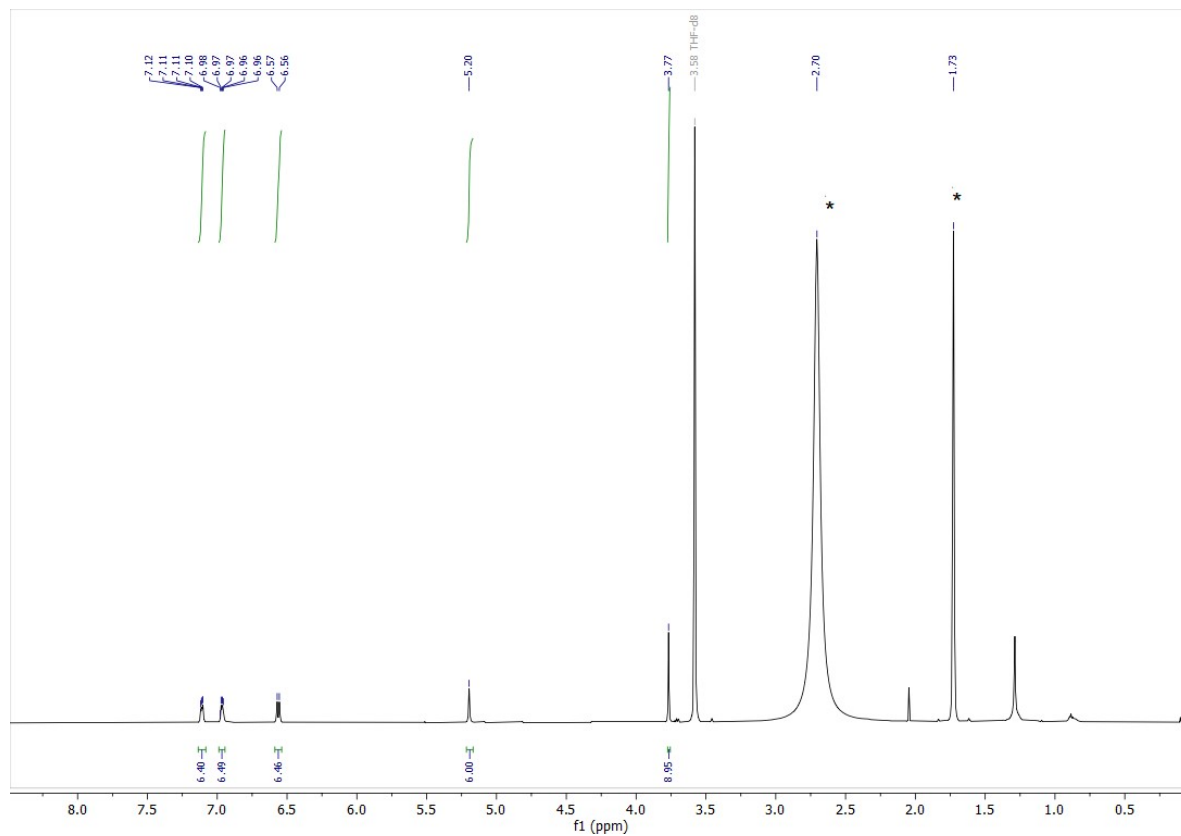

Figure S3.26.  $^1\text{H}$  NMR spectrum ( $\text{THF-}d_8$ ) of NRos-8

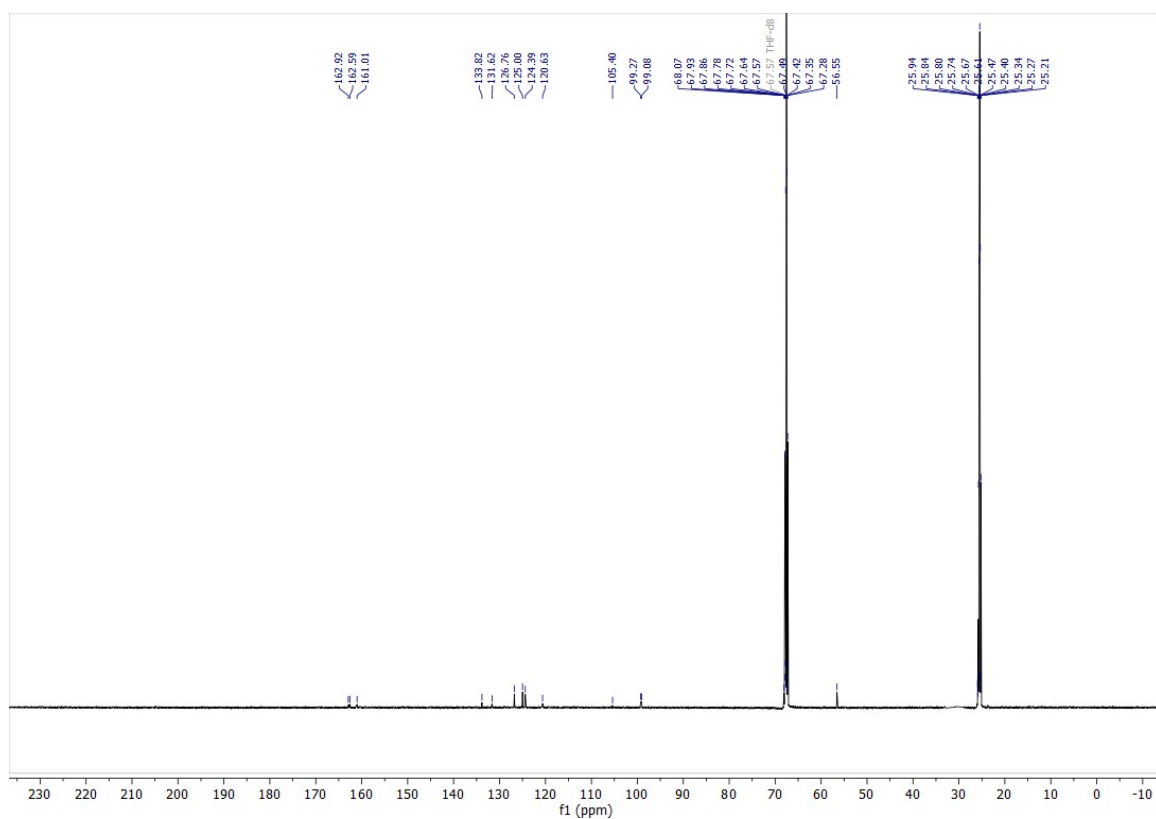

**Figure S3.27.  $^{13}\text{C}$  NMR spectrum (THF- $d_8$ ) of NRos-8**

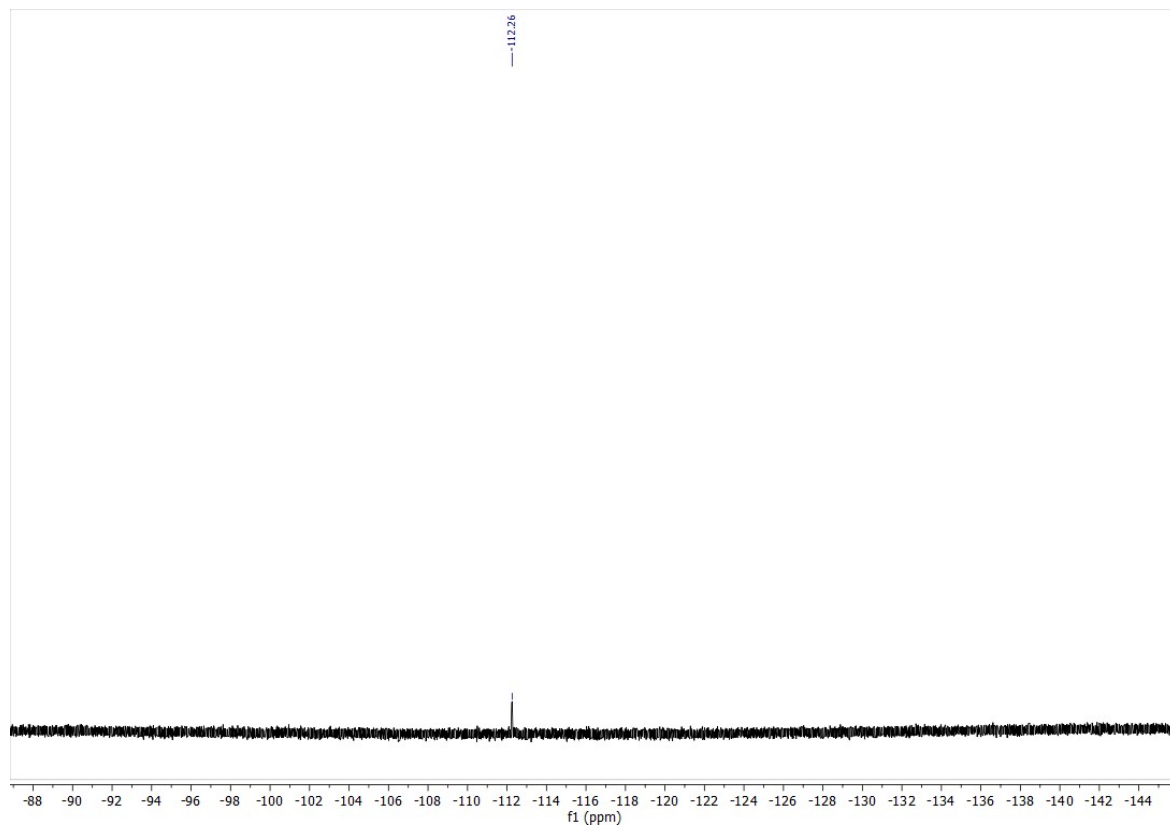

**Figure S3.28.  $^{19}\text{F}$  NMR spectrum (THF- $d_8$ ) of NRos-8**

## 4. Mass Spectra

MS Zoomed Spectrum

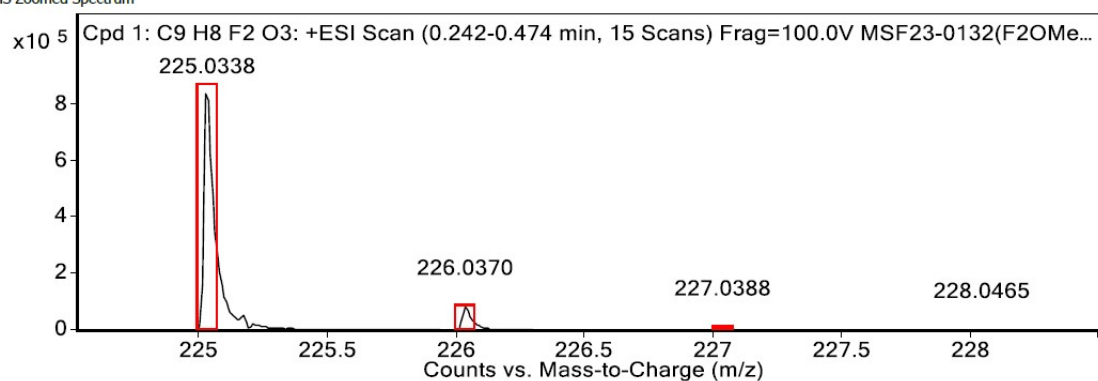

MS Spectrum Peak List

| Obs. m/z | Calc. m/z | Charge | Abundance | Formula  | Ion Species | Tgt Mass Error (ppm) |
|----------|-----------|--------|-----------|----------|-------------|----------------------|
| 225.0338 | 225.0334  | 1      | 868627    | C9H8F2O3 | (M+Na)+     | -2.1                 |
| 226.0370 | 226.0368  | 1      | 83036     | C9H8F2O3 | (M+Na)+     | -0.88                |
| 227.0388 | 227.0387  | 1      | 10190     | C9H8F2O3 | (M+Na)+     | -0.38                |
| 228.0465 | 228.0414  | 1      | 1055      | C9H8F2O3 | (M+Na)+     | -22.14               |
| 229.0698 | 229.0438  | 1      | 3582      | C9H8F2O3 | (M+Na)+     | -113.71              |

--- End Of Report ---

**Figure S4.1.** HRMS of 2,6-difluoro-3,5-dimethoxybenzaldehyde (ESI-TOF, pos. mode, acetonitrile)

MS Zoomed Spectrum

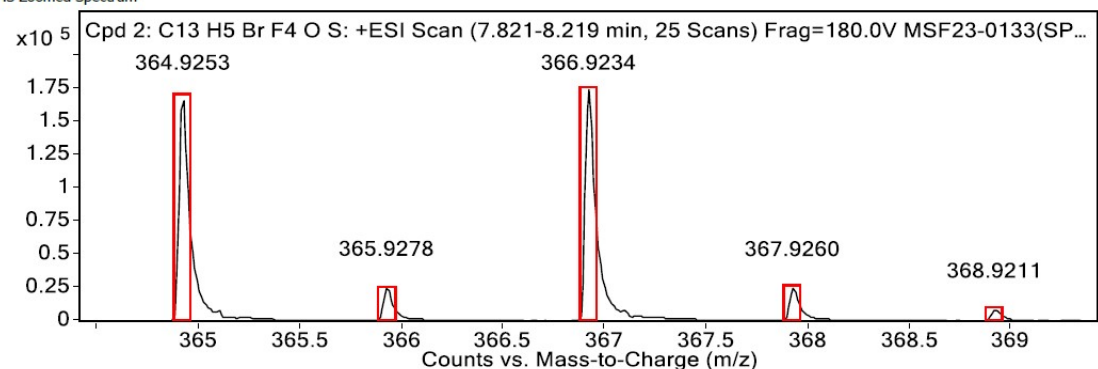

MS Spectrum Peak List

| Obs. m/z | Calc. m/z | Charge | Abundance | Formula     | Ion Species | Tgt Mass Error (ppm) |
|----------|-----------|--------|-----------|-------------|-------------|----------------------|
| 364.9253 | 364.9253  | 1      | 167559    | C13H5BrF4OS | (M+H)+      | 0.11                 |
| 365.9278 | 365.9285  | 1      | 25493     | C13H5BrF4OS | (M+H)+      | 1.87                 |
| 366.9234 | 366.9233  | 1      | 174318    | C13H5BrF4OS | (M+H)+      | -0.27                |
| 367.9260 | 367.9264  | 1      | 25242     | C13H5BrF4OS | (M+H)+      | 1.08                 |
| 368.9211 | 368.9214  | 1      | 9014      | C13H5BrF4OS | (M+H)+      | 0.76                 |

--- End Of Report ---

**Figure S4.2.** HRMS of 4-((4-bromophenyl)thio)-2,3,5,6-tetrafluorobenzaldehyde (ESI-TOF, pos. mode, acetonitrile)



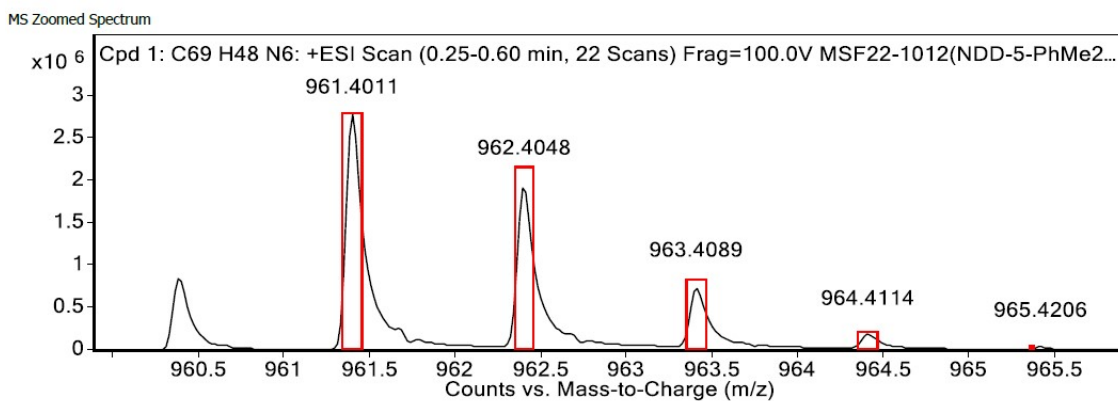

MS Spectrum Peak List

| Obs. m/z | Calc. m/z | Charge | Abundance | Formula                                        | Ion Species        | Tgt Mass Error (ppm) |
|----------|-----------|--------|-----------|------------------------------------------------|--------------------|----------------------|
| 961.4011 | 961.4013  | 1      | 2786446   | C <sub>69</sub> H <sub>48</sub> N <sub>6</sub> | (M+H) <sup>+</sup> | 0.26                 |
| 962.4048 | 962.4045  | 1      | 1945694   | C <sub>69</sub> H <sub>48</sub> N <sub>6</sub> | (M+H) <sup>+</sup> | -0.26                |
| 963.4089 | 963.4077  | 1      | 738707    | C <sub>69</sub> H <sub>48</sub> N <sub>6</sub> | (M+H) <sup>+</sup> | -1.2                 |
| 964.4114 | 964.4109  | 1      | 168984    | C <sub>69</sub> H <sub>48</sub> N <sub>6</sub> | (M+H) <sup>+</sup> | -0.56                |
| 965.4206 | 965.4141  | 1      | 28603     | C <sub>69</sub> H <sub>48</sub> N <sub>6</sub> | (M+H) <sup>+</sup> | -6.69                |

--- End Of Report ---

**Figure S4.3.** HRMS of NRos-1 (ESI-TOF, pos. mode, acetonitrile)

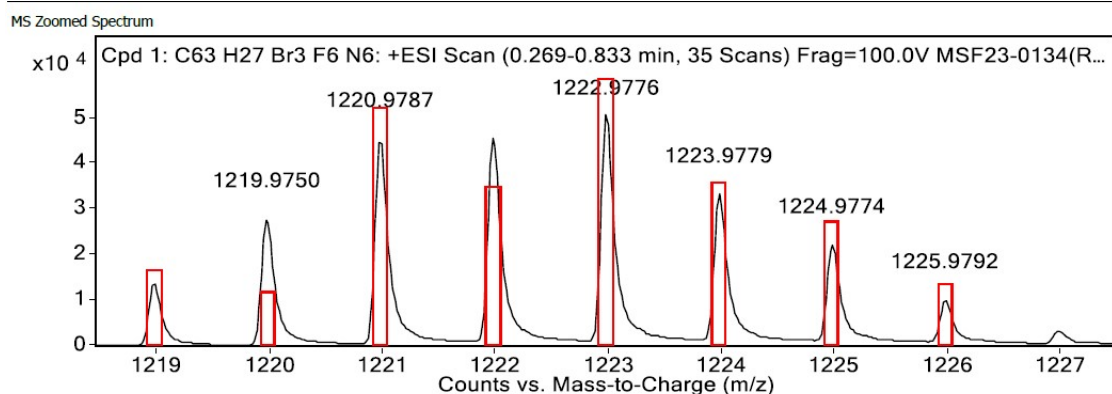

MS Spectrum Peak List

| Obs. m/z  | Calc. m/z | Charge | Abundance | Formula                                                                       | Ion Species        | Tgt Mass Error (ppm) |
|-----------|-----------|--------|-----------|-------------------------------------------------------------------------------|--------------------|----------------------|
| 676.9426  |           |        | 128172    |                                                                               |                    |                      |
| 1218.9791 | 1218.9824 | 1      | 13886     | C <sub>63</sub> H <sub>27</sub> Br <sub>3</sub> F <sub>6</sub> N <sub>6</sub> | (M+H) <sup>+</sup> | 2.69                 |
| 1220.9787 | 1220.9810 | 1      | 45610     | C <sub>63</sub> H <sub>27</sub> Br <sub>3</sub> F <sub>6</sub> N <sub>6</sub> | (M+H) <sup>+</sup> | 1.91                 |
| 1221.9769 | 1221.9838 | 1      | 46043     | C <sub>63</sub> H <sub>27</sub> Br <sub>3</sub> F <sub>6</sub> N <sub>6</sub> | (M+H) <sup>+</sup> | 5.66                 |
| 1222.9776 | 1222.9801 | 1      | 51022     | C <sub>63</sub> H <sub>27</sub> Br <sub>3</sub> F <sub>6</sub> N <sub>6</sub> | (M+H) <sup>+</sup> | 1.99                 |

--- End Of Report ---

**Figure S4.4.** HRMS of NRos-3 (ESI-TOF, pos. mode, acetonitrile)

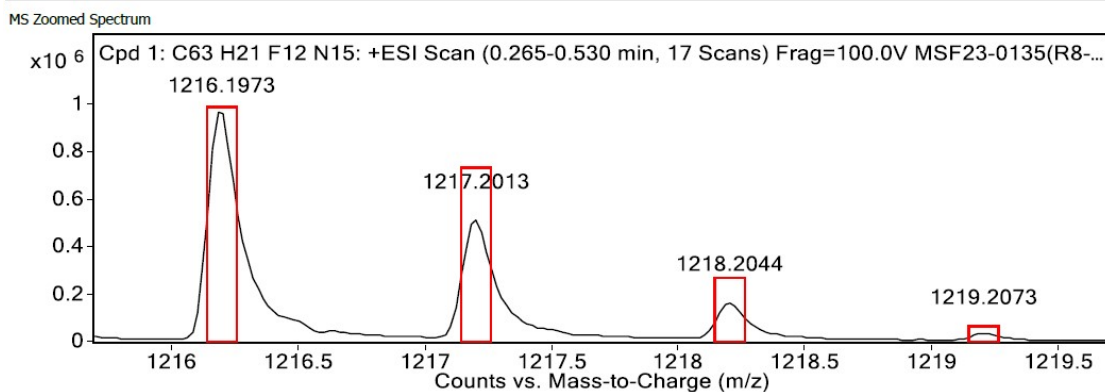

MS Spectrum Peak List

| Obs. m/z  | Calc. m/z | Charge | Abundance | Formula                                                         | Ion Species        | Tgt Mass Error (ppm) |
|-----------|-----------|--------|-----------|-----------------------------------------------------------------|--------------------|----------------------|
| 1216.1973 | 1216.1986 | 1      | 987391    | C <sub>63</sub> H <sub>21</sub> F <sub>12</sub> N <sub>15</sub> | (M+H) <sup>+</sup> | 1.01                 |
| 1217.2013 | 1217.2014 | 1      | 517548    | C <sub>63</sub> H <sub>21</sub> F <sub>12</sub> N <sub>15</sub> | (M+H) <sup>+</sup> | 0.11                 |
| 1218.2044 | 1218.2043 | 1      | 171030    | C <sub>63</sub> H <sub>21</sub> F <sub>12</sub> N <sub>15</sub> | (M+H) <sup>+</sup> | -0.03                |
| 1219.2073 | 1219.2072 | 1      | 30602     | C <sub>63</sub> H <sub>21</sub> F <sub>12</sub> N <sub>15</sub> | (M+H) <sup>+</sup> | -0.04                |
| 1220.2077 | 1220.2101 | 1      | 5459      | C <sub>63</sub> H <sub>21</sub> F <sub>12</sub> N <sub>15</sub> | (M+H) <sup>+</sup> | 1.99                 |

--- End Of Report ---

Figure S4.9. HRMS of NRos-4 (ESI-TOF, pos. mode, acetonitrile)

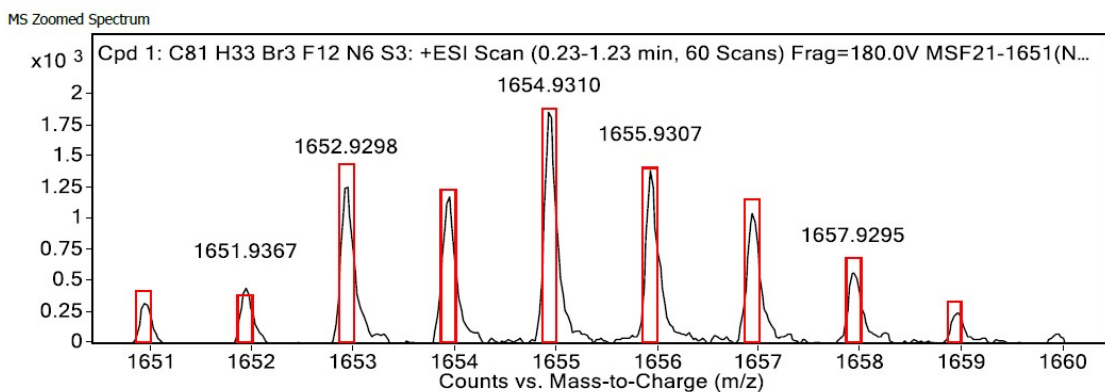

MS Spectrum Peak List

| Obs. m/z  | Calc. m/z | Charge | Abundance | Formula                                                                                       | Ion Species        | Tgt Mass Error (ppm) |
|-----------|-----------|--------|-----------|-----------------------------------------------------------------------------------------------|--------------------|----------------------|
| 505.2004  |           |        | 8442      |                                                                                               |                    |                      |
| 1650.9456 | 1650.9360 | 1      | 327       | C <sub>81</sub> H <sub>33</sub> Br <sub>3</sub> F <sub>12</sub> N <sub>6</sub> S <sub>3</sub> | (M+H) <sup>+</sup> | -5.82                |
| 1651.9367 | 1651.9391 | 1      | 443       | C <sub>81</sub> H <sub>33</sub> Br <sub>3</sub> F <sub>12</sub> N <sub>6</sub> S <sub>3</sub> | (M+H) <sup>+</sup> | 1.5                  |
| 1652.9298 | 1652.9349 | 1      | 1284      | C <sub>81</sub> H <sub>33</sub> Br <sub>3</sub> F <sub>12</sub> N <sub>6</sub> S <sub>3</sub> | (M+H) <sup>+</sup> | 3.05                 |
| 1653.9310 | 1653.9373 | 1      | 1189      | C <sub>81</sub> H <sub>33</sub> Br <sub>3</sub> F <sub>12</sub> N <sub>6</sub> S <sub>3</sub> | (M+H) <sup>+</sup> | 3.86                 |
| 1654.9310 | 1654.9341 | 1      | 1882      | C <sub>81</sub> H <sub>33</sub> Br <sub>3</sub> F <sub>12</sub> N <sub>6</sub> S <sub>3</sub> | (M+H) <sup>+</sup> | 1.91                 |
| 1655.9307 | 1655.9358 | 1      | 1385      | C <sub>81</sub> H <sub>33</sub> Br <sub>3</sub> F <sub>12</sub> N <sub>6</sub> S <sub>3</sub> | (M+H) <sup>+</sup> | 3.07                 |
| 1656.9315 | 1656.9340 | 1      | 1050      | C <sub>81</sub> H <sub>33</sub> Br <sub>3</sub> F <sub>12</sub> N <sub>6</sub> S <sub>3</sub> | (M+H) <sup>+</sup> | 1.51                 |
| 1657.9295 | 1657.9347 | 1      | 571       | C <sub>81</sub> H <sub>33</sub> Br <sub>3</sub> F <sub>12</sub> N <sub>6</sub> S <sub>3</sub> | (M+H) <sup>+</sup> | 3.1                  |
| 1658.9427 | 1658.9347 | 1      | 254       | C <sub>81</sub> H <sub>33</sub> Br <sub>3</sub> F <sub>12</sub> N <sub>6</sub> S <sub>3</sub> | (M+H) <sup>+</sup> | -4.82                |

--- End Of Report ---

Figure S4.8. HRMS of NRos-5 (ESI-TOF, pos. mode, acetonitrile)

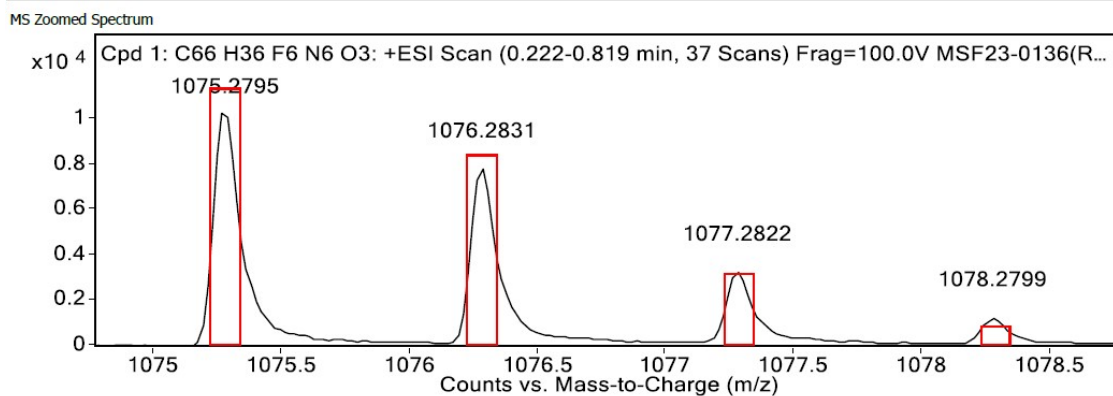

MS Spectrum Peak List

| Obs. m/z  | Calc. m/z | Charge | Abundance | Formula                                                                      | Ion Species        | Tgt Mass Error (ppm) |
|-----------|-----------|--------|-----------|------------------------------------------------------------------------------|--------------------|----------------------|
| 405.2801  |           |        | 18028     |                                                                              |                    |                      |
| 1075.2795 | 1075.2826 | 1      | 10445     | C <sub>66</sub> H <sub>36</sub> F <sub>6</sub> N <sub>6</sub> O <sub>3</sub> | (M+H) <sup>+</sup> | 2.85                 |
| 1076.2831 | 1076.2858 | 1      | 7807      | C <sub>66</sub> H <sub>36</sub> F <sub>6</sub> N <sub>6</sub> O <sub>3</sub> | (M+H) <sup>+</sup> | 2.44                 |
| 1077.2822 | 1077.2889 | 1      | 3253      | C <sub>66</sub> H <sub>36</sub> F <sub>6</sub> N <sub>6</sub> O <sub>3</sub> | (M+H) <sup>+</sup> | 6.26                 |
| 1078.2799 | 1078.2920 | 1      | 1239      | C <sub>66</sub> H <sub>36</sub> F <sub>6</sub> N <sub>6</sub> O <sub>3</sub> | (M+H) <sup>+</sup> | 11.22                |

--- End Of Report ---

**Figure S4.6.** HRMS of NRos-6 (ESI-TOF, pos. mode, acetonitrile)

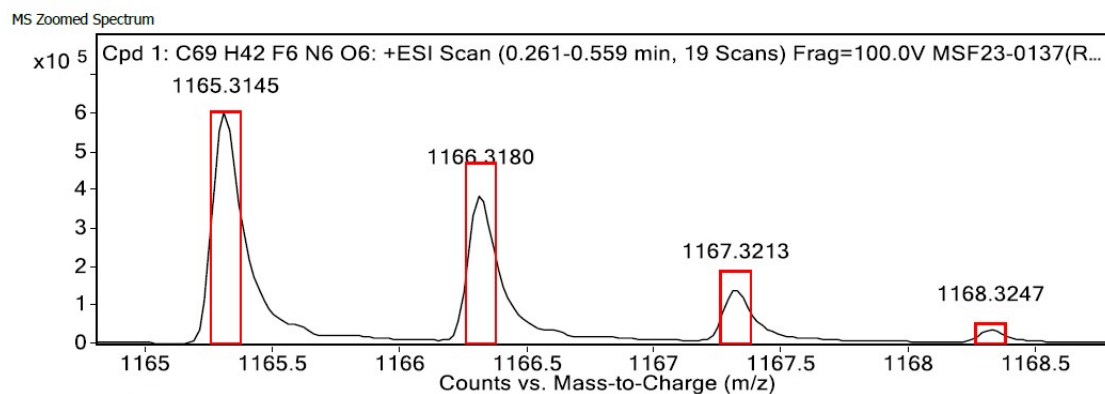

MS Spectrum Peak List

| Obs. m/z  | Calc. m/z | Charge | Abundance | Formula                                                                      | Ion Species        | Tgt Mass Error (ppm) |
|-----------|-----------|--------|-----------|------------------------------------------------------------------------------|--------------------|----------------------|
| 1165.3145 | 1165.3143 | 1      | 603884    | C <sub>69</sub> H <sub>42</sub> F <sub>6</sub> N <sub>6</sub> O <sub>6</sub> | (M+H) <sup>+</sup> | -0.2                 |
| 1166.3180 | 1166.3175 | 1      | 388211    | C <sub>69</sub> H <sub>42</sub> F <sub>6</sub> N <sub>6</sub> O <sub>6</sub> | (M+H) <sup>+</sup> | -0.48                |
| 1167.3213 | 1167.3206 | 1      | 142759    | C <sub>69</sub> H <sub>42</sub> F <sub>6</sub> N <sub>6</sub> O <sub>6</sub> | (M+H) <sup>+</sup> | -0.62                |
| 1168.3247 | 1168.3236 | 1      | 31616     | C <sub>69</sub> H <sub>42</sub> F <sub>6</sub> N <sub>6</sub> O <sub>6</sub> | (M+H) <sup>+</sup> | -0.91                |
| 1169.3281 | 1169.3266 | 1      | 6047      | C <sub>69</sub> H <sub>42</sub> F <sub>6</sub> N <sub>6</sub> O <sub>6</sub> | (M+H) <sup>+</sup> | -1.31                |

--- End Of Report ---

**Figure S4.7.** HRMS of NRos-7 (ESI-TOF, pos. mode, acetonitrile)

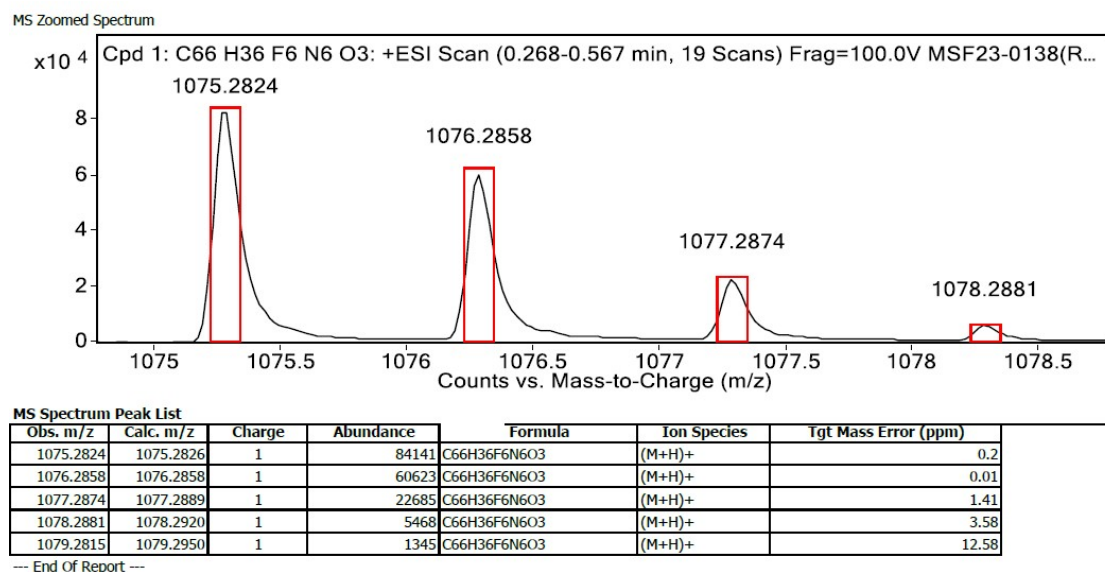

Figure S4.5. HRMS of NRos-8 (ESI-TOF, pos. mode, acetonitrile)

## 5. UV-vis Spectra

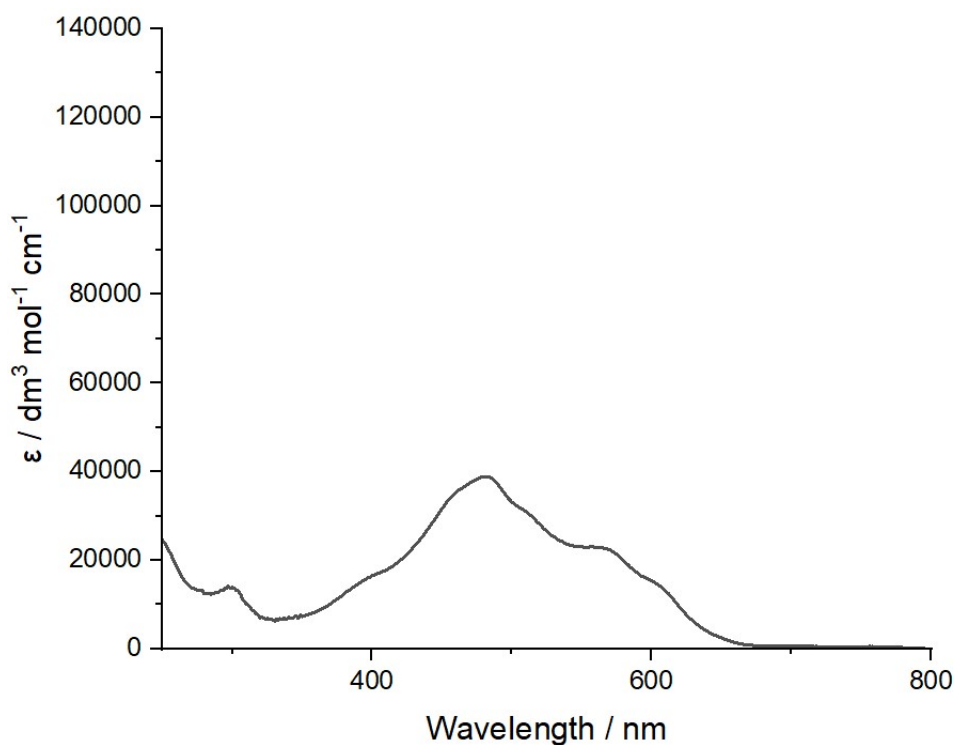

Figure S5.1. UV-vis absorption spectrum of NRos-1 (in CH<sub>2</sub>Cl<sub>2</sub>).

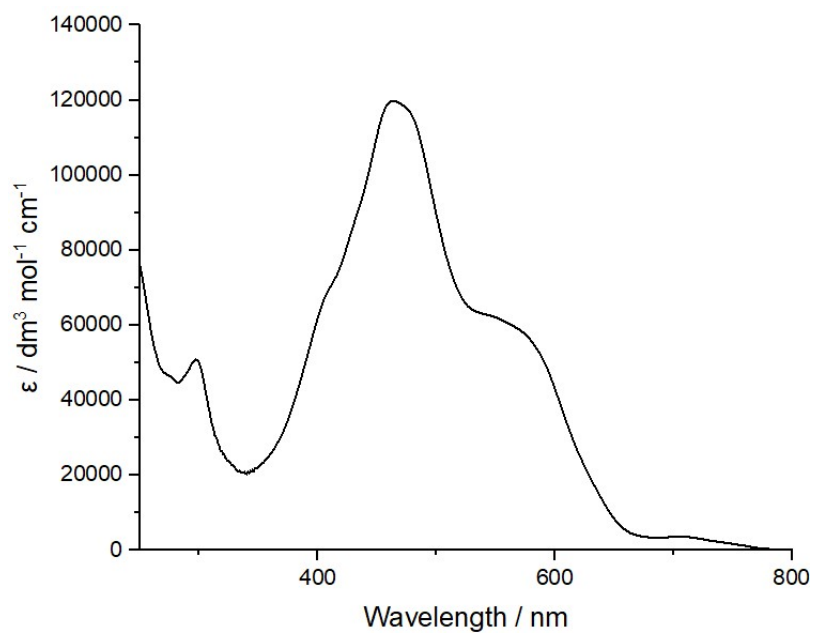

**Figure S5.2.** UV-vis absorption spectrum of of NRos-2 (in CH<sub>2</sub>Cl<sub>2</sub>).

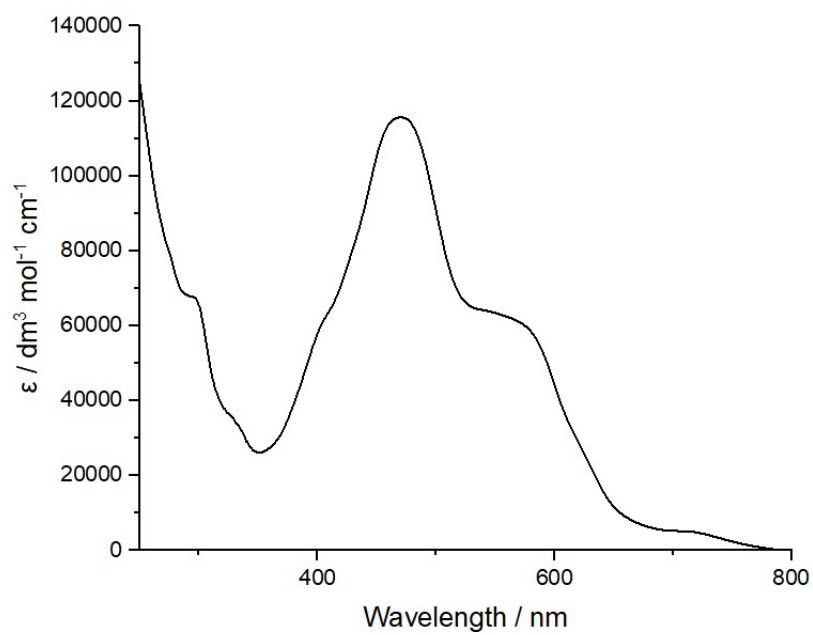

**Figure S5.3.** UV-vis absorption spectrum of of NRos-3 (in CH<sub>2</sub>Cl<sub>2</sub>).

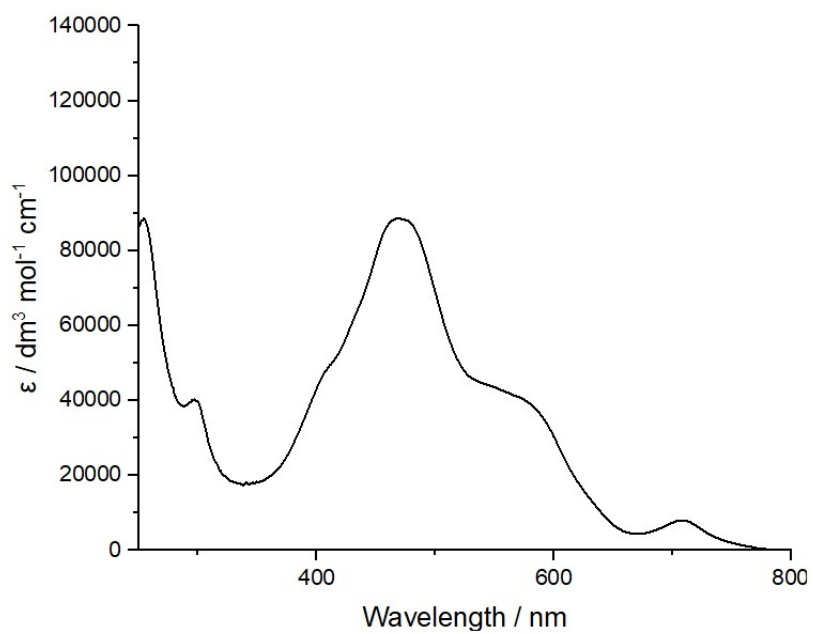

**Figure S5.4.** UV-vis absorption spectrum of NRos-4 (in CH<sub>2</sub>Cl<sub>2</sub>).

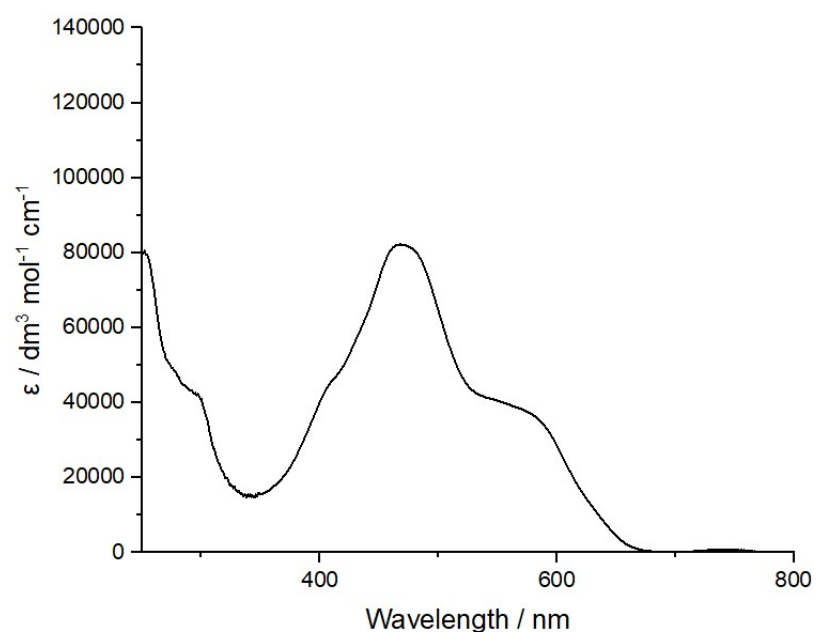

**Figure S5.5.** UV-vis absorption spectrum of NRos-5 (in CH<sub>2</sub>Cl<sub>2</sub>).

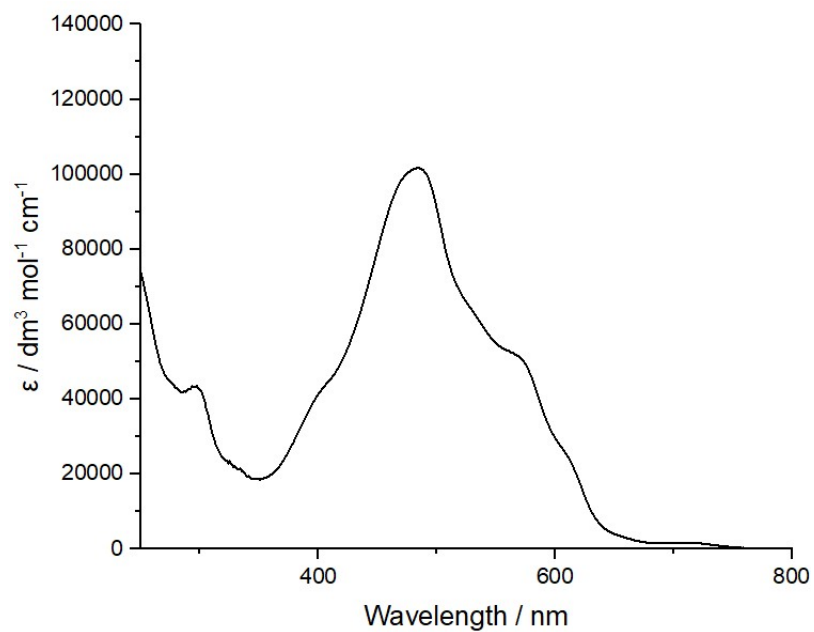

**Figure S5.6.** UV-vis absorption spectrum of NRos-6 (in CH<sub>2</sub>Cl<sub>2</sub>).

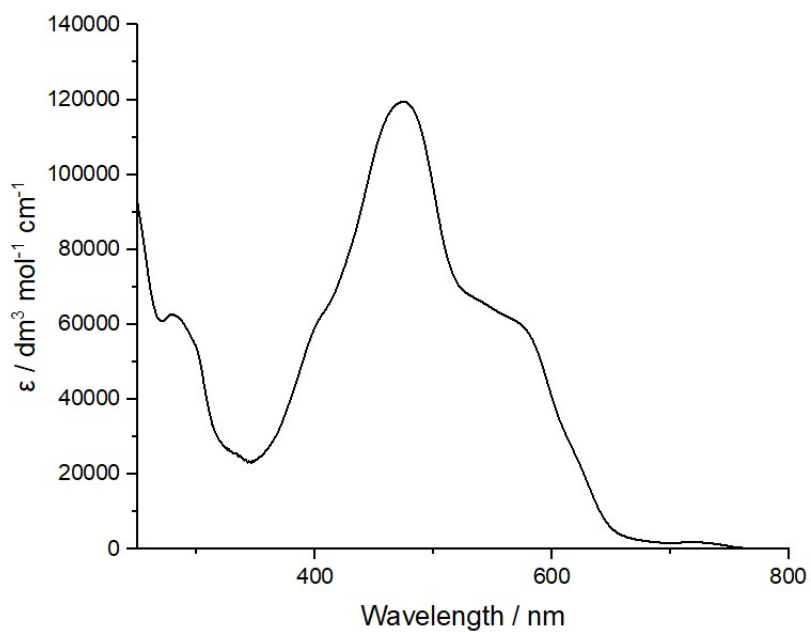

**Figure S5.7.** UV-vis absorption spectrum of NRos-7 (in CH<sub>2</sub>Cl<sub>2</sub>).

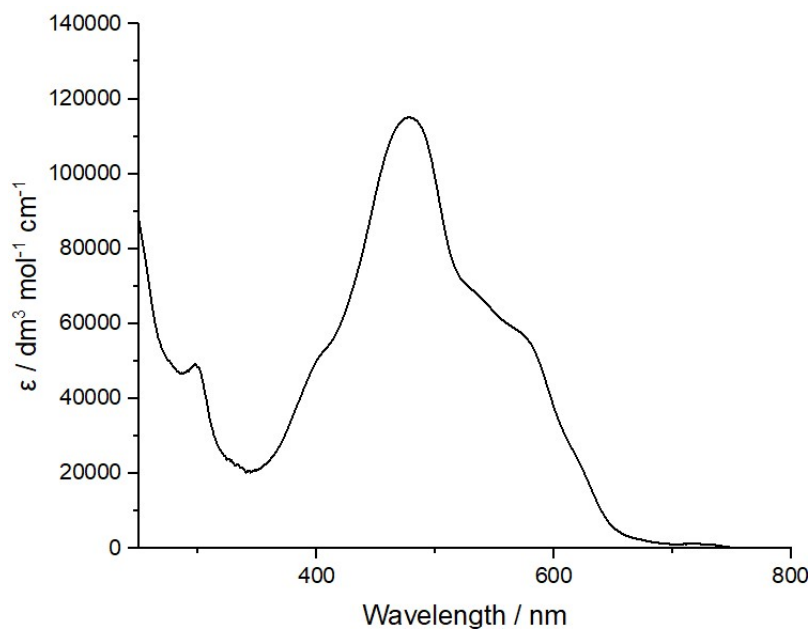

**Figure S5.8.** UV-vis absorption spectrum of **NRos-8** (in  $\text{CH}_2\text{Cl}_2$ ).

## 6. Electrochemistry

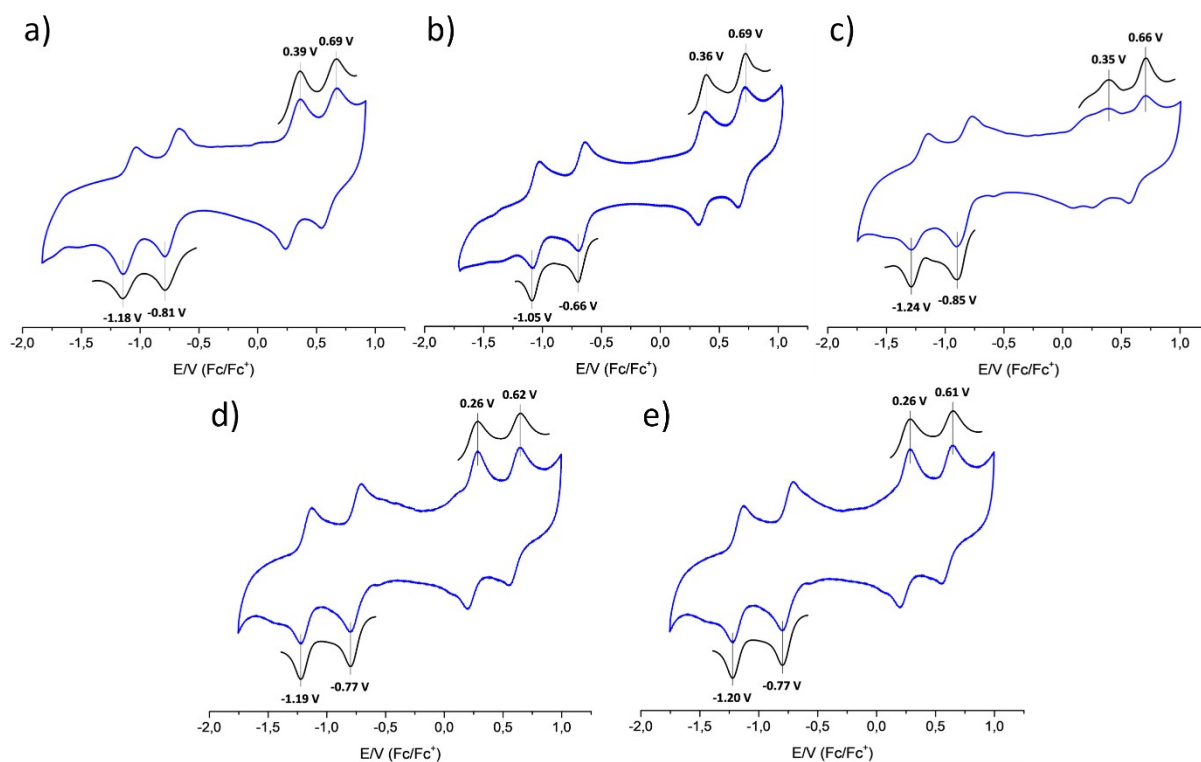

**Figure S6.1.** Cyclic (closed curves) and differential-pulse voltammograms (open graphs) of **NRos-2** (a), **NRos-3** (b), **NRos-6** (c), **NRos-7** (d) and **NRos-8** (e) recorded in  $\text{CH}_2\text{Cl}_2$  at room temperature using  $\text{Bu}_4\text{NPF}_6$  as the electrolyte.



## 7. Computational studies

All reported structures were optimized at the DFT level using the B3LYP<sup>5</sup> functional. The standard 6-31G(d,p) basis set was used for all atoms considered. Analytical harmonic frequencies were computed at the same level of theory to confirm the nature of the stationary points. All of the calculations were carried out by the methods implemented in the Gaussian 16 package.<sup>6</sup> TD-DFT calculations were carried out at the CAM-B3LYP/6-31+G(d,p) level of theory. For the mechanistic studies, the reported energy values correspond to the Gibbs Free (G) energies. Transition state geometries were connected with reactants and products via Intrinsic Reaction Coordinate (IRC) calculations. Solvent (CH<sub>2</sub>Cl<sub>2</sub>) effects were also considered through the Polarizable Continuum Model (PCM).

### TD-DFT calculations

| Excited state  | Energy (nm) | $f^{[a]}$ | Orbitals <sup>[b]</sup> (coefficient)                                           |
|----------------|-------------|-----------|---------------------------------------------------------------------------------|
| S <sub>1</sub> | 1006        | 0.0000    | H→L (69%)                                                                       |
| S <sub>2</sub> | 541         | 0.0789    | H-3→L+2 (11%)<br>H-2→L+2 (12%)<br>H-1→L (64%)<br>H-1→L+1 (12%)                  |
| S <sub>3</sub> | 541         | 0.0789    | H-3→L (11%)<br>H-2→L (64%)<br>H-2→L+1 (12%)<br>H-1→L+2 (12%)                    |
| S <sub>4</sub> | 478         | 0.0000    | H-3→L (57%)<br>H-2→L+1 (15%)<br>H-2→L+2 (22%)<br>H-1→L+1 (22%)<br>H-1→L+2 (15%) |
| S <sub>5</sub> | 436         | 1.1656    | H-1→L (13%)<br>H→L+1 (67%)                                                      |
| S <sub>6</sub> | 436         | 1.1656    | H-2→L (13%)<br>H→L+2 (67%)                                                      |

**Table**

**S7.1.**

Selected transition properties of **NRos-2** calculated at the CAM-B3LYP/6-31+G(d,p) level of theory. <sup>[a]</sup>Oscillator strength. <sup>[b]</sup>MOs involved in the transitions (H and L denoting HOMO and LUMO).

| Excited state  | Energy (nm) | $f^{[a]}$ | Orbitals <sup>[b]</sup> (coefficient)                                           |
|----------------|-------------|-----------|---------------------------------------------------------------------------------|
| S <sub>1</sub> | 1088        | 0.0000    | H→L (69%)                                                                       |
| S <sub>2</sub> | 532         | 0.0889    | H-3→L+1 (14%)<br>H-2→L (63%)                                                    |
| S <sub>3</sub> | 532         | 0.0889    | H-3→L+2 (14%)<br>H-2→L (13%)<br>H-2→L+1 (12%)<br>H-1→L (63%)                    |
| S <sub>4</sub> | 471         | 0.0000    | H-3→L (56%)<br>H-2→L+1 (21%)<br>H-2→L+2 (16%)<br>H-1→L+1 (16%)<br>H-1→L+2 (21%) |
| S <sub>5</sub> | 435         | 1.2324    | H→L+1 (67%)                                                                     |

S<sub>6</sub>                      435                      1.2324    H→L+2 (67%)

---

**Table S7.2.** Selected transition properties of **NRos-3** calculated at the CAM-B3LYP/6-31+G(d,p) level of theory. <sup>[a]</sup>Oscillator strength. <sup>[b]</sup>MOs involved in the transitions (H and L denoting HOMO and LUMO).

| Excited state  | Energy (nm) | <i>f</i> <sup>[a]</sup> | Orbitals <sup>[b]</sup> (coefficient)                                         |
|----------------|-------------|-------------------------|-------------------------------------------------------------------------------|
| S <sub>1</sub> | 1040        | 0.0000                  | H→L (69%)                                                                     |
| S <sub>2</sub> | 519         | 0.1091                  | H-3→L+1 (13%)<br>H-2→L (53%)<br>H-2→L+2 (11%)<br>H-1→L (38%)                  |
| S <sub>3</sub> | 519         | 0.1091                  | H-1→L+1 (11%)<br>H-3→L+2 (13%)<br>H-2→L (38%)<br>H-2→L+1 (11%)<br>H-1→L (53%) |
| S <sub>4</sub> | 463         | 0.0000                  | H-1→L+2 (11%)<br>H-3→L (57%)<br>H-2→L+1 (25%)<br>H-1→L+2 (25%)                |
| S <sub>5</sub> | 431         | 1.3314                  | H-2→L (11%)<br>H→L+1 (67%)                                                    |
| S <sub>6</sub> | 430         | 1.3319                  | H-1→L (11%)<br>H→L+2 (67%)                                                    |

**Table S7.3.** Selected transition properties of **NRos-6** calculated at the CAM-B3LYP/6-31+G(d,p) level of theory. <sup>[a]</sup>Oscillator strength. <sup>[b]</sup>MOs involved in the transitions (H and L denoting HOMO and LUMO).

| Excited state  | Energy (nm) | <i>f</i> <sup>[a]</sup> | Orbitals <sup>[b]</sup> (coefficient)                                                        |
|----------------|-------------|-------------------------|----------------------------------------------------------------------------------------------|
| S <sub>1</sub> | 1070        | 0.0000                  | H→L (69%)                                                                                    |
| S              | 523         | 0.0942                  | H-3→L+2 (14%)<br>H-2→L (63%)<br>H-2→L+2 (11%)<br>H-1→L (14%)<br>H-1→L+2 (11%)<br>H→L+1 (10%) |
| S <sub>3</sub> | 523         | 0.0942                  | H-3→L+2 (14%)<br>H-2→L (14%)                                                                 |

|                |     |        |               |
|----------------|-----|--------|---------------|
|                |     |        | H-2→L+1 (11%) |
|                |     |        | H-1→L (63%)   |
|                |     |        | H-1→L+2 (11%) |
|                |     |        | H→L+2 (10%)   |
| S <sub>4</sub> | 463 | 0.0000 | H-3→L (56%)   |
|                |     |        | H-2→L+1 (26%) |
|                |     |        | H-1→L+2 (26%) |
| S <sub>5</sub> | 434 | 1.2517 | H-2→L (11%)   |
|                |     |        | H→L+1 (67%)   |
| S <sub>6</sub> | 434 | 1.2528 | H-1→L (11%)   |
|                |     |        | H→L+2 (67%)   |

**Table S7.4.** Selected transition properties of **NRos-7** calculated at the CAM-B3LYP/6-31+G(d,p) level of theory. <sup>[a]</sup>Oscillator strength. <sup>[b]</sup>MOs involved in the transitions (H and L denoting HOMO and LUMO).

| Excited state  | Energy (nm) | $f^{[a]}$ | Orbitals <sup>[b]</sup> (coefficient) |
|----------------|-------------|-----------|---------------------------------------|
| S <sub>1</sub> | 1070        | 0.0000    | H→L (69%)                             |
| S <sub>2</sub> | 523         | 0.0991    | H-3→L+2 (11%)                         |
|                |             |           | H-2→L (22%)                           |
|                |             |           | H-2→L+1 (12%)                         |
|                |             |           | H-1→L (61%)                           |
|                |             |           | H-1→L+2 (12%)                         |
| S <sub>3</sub> | 523         | 0.0990    | H-3→L+1 (11%)                         |
|                |             |           | H-2→L (61%)                           |
|                |             |           | H-2→L+2 (12%)                         |
|                |             |           | H-1→L (22%)                           |
|                |             |           | H-1→L+1 (12%)                         |
| S <sub>4</sub> | 464         | 0.0000    | H-3→L (56%)                           |
|                |             |           | H-2→L+1 (27%)                         |
|                |             |           | H-1→L+2 (27%)                         |
| S <sub>5</sub> | 434         | 1.2687    | H-2→L (13%)                           |
|                |             |           | H→L+1 (67%)                           |
| S <sub>6</sub> | 434         | 1.2687    | H-1→L (13%)                           |
|                |             |           | H→L+2 (67%)                           |

**Table S7.5.** Selected transition properties of **NRos-8** calculated at the CAM-B3LYP/6-31+G(d,p) level of theory. <sup>[a]</sup>Oscillator strength. <sup>[b]</sup>MOs involved in the transitions (H and L denoting HOMO and LUMO).

## 8. Supporting References

- 
- [1] N. R. Babij, E. O. McCusker, G. T. Whiteker, B. Canturk, N. Choy, L. C. Creemer, C. V. D. Amicis, N. M. Hewlett, P. L. Johnson, J. A. Knobelsdorf, F. Li, B. A. Lorsbach, B. M. Nugent, S. J. Ryan, M. R. Smith and Q. Yang, *Org. Process Res. Dev.* 2016, **20**, 661.
- [2] Roznyatovskiy, V., Lynch, V. and Sessler, J. L., *Org. Lett.* 2010, **12**, 4424–4427.
- [3] Keana, J. F. W., Cai, X. S., *J. Org. Chem.* 1990, **55**, 3640–3647.
- [4] a) M. Ishida, S. J. Kim, C. Preihs, K. Ohkubo, J. M. Lim, B. S. Lee, J. S. Park, V. M. Lynch, V. V. Roznyatovskiy, T. Sarma, P. K. Panda, C. H. Lee, S. Fukuzumi, D. Kim and J. L. Sessler, *Nat. Chem.*, 2012, **5**, 15. b) D. Firmansyah, S. J. Hong, R. Dutta, Q. He, J. Bae, H. Jo, H. Kim, K. M. Ok, V. M. Lynch, H. R. Byon, J. L. Sessler and C. H. Lee, *Chem. Eur. J.*, 2019, **25**, 3525.
- [5] a) C. Lee, W. Yang, R. G. Parr, *Phys. Rev. B* 1988, **37**, 785–789. b) A. D. Becke, *J. Chem. Phys.* 1993, **98**, 5648. c) W. Kohn, A. D. Becke, R. G. Parr, *J. Phys. Chem.* 1996, **100**, 12974–12980
- [6] Gaussian 16, Revision C.01; Frisch, M. J.; Trucks, G. W.; Schlegel, H. B.; Scuseria, G. E.; Robb, M. A.; Cheeseman, J. R.; Scalmani, G.; Barone, V.; Petersson, G. A.; Nakatsuji, H.; Li, X.; Caricato, M.; Marenich, A. V.; Bloino, J.; Janesko, B. G.; Gomperts, R.; Mennucci, B.; Hratchian, H. P.; Ortiz, J. V.; Izmaylov, A. F.; Sonnenberg, J. L.; Williams-Young, D.; Ding, F.; Lipparini, F.; Egidi, F.; Goings, J.; Peng, B.; Petrone, A.; Henderson, T.; Ranasinghe, D.; Zakrzewski, V. G.; Gao, J.; Rega, N.; Zheng, G.; Liang, W.; Hada, M.; Ehara, M.; Toyota, K.; Fukuda, R.; Hasegawa, J.; Ishida, M.; Nakajima, T.; Honda, Y.; Kitao, O.; Nakai, H.; Vreven, T.; Throssell, K.; Montgomery, J. A., Jr.; Peralta, J. E.; Ogliaro, F.; Bearpark, M. J.; Heyd, J. J.; Brothers, E. N.; Kudin, K. N.; Staroverov, V. N.; Keith, T. A.; Kobayashi, R.; Normand, J.; Raghavachari, K.; Rendell, A. P.; Burant, J. C.; Iyengar, S. S.; Tomasi, J.; Cossi, M.; Millam, J. M.; Klene, M.; Adamo, C.; Cammi, R.; Ochterski, J. W.; Martin, R. L.; Morokuma, K.; Farkas, O.; Foresman, J. B.; Fox, D. J. Gaussian, Inc., Wallingford CT, 2016
